# Supplementary material for: Myeloid-Derived Suppressor-like Cells as a Prognostic Marker in Critically Ill Patients: Insights from Experimental Endotoxemia and Intensive Care Patients
Source: MDPI journal article supplement (doi:10.3390/cells13040314), 2024-02-08
Supplement: s1 [file s1]

# Myeloid-derived suppressor-like cells as a prognostic marker in critically ill patients: insights from experimental endotoxemia and intensive care patients

Irene T. Schrijver <sup>1†</sup>, Jacobus Herderschee <sup>1†</sup>, Charlotte Theroude <sup>1</sup>, Antonios Kritikos <sup>1</sup>, Guus Leijte <sup>2,3</sup>, Didier Le Roy <sup>1</sup>, Maelick Brochut <sup>1</sup>, Jean-Daniel Chiche <sup>4</sup>, Matthieu Perreau <sup>5</sup>, Giuseppe Pantaleo <sup>5</sup>, Benoit Guery <sup>1</sup>, Matthijs Kox <sup>2,3</sup>, Peter Pickkers <sup>2,3</sup>, Thierry Calandra <sup>1†</sup>, Thierry Roger <sup>1,\*</sup>

1 Infectious Diseases Service, Department of Medicine, Lausanne University Hospital and University of Lausanne, Lausanne, Switzerland

2 Radboud Center for Infectious Diseases, Radboud University Medical Center, Nijmegen, The Netherlands

3 Department of Intensive Care Medicine, Radboud University Medical Center, Nijmegen, The Netherlands

4 Service of Adult Intensive Care Medicine, Lausanne University Hospital and University of Lausanne, Lausanne, Switzerland

5 Service of Immunology and Allergy, Department of Medicine, Lausanne University Hospital and University of Lausanne, Lausanne, Switzerland

\* Correspondence: Thierry.Roger@chuv.ch; Tel.: +41-21-314-1038; ORCID 0000-0002-9358-0109

† Co-authorship

19 **Supplementary Figures**

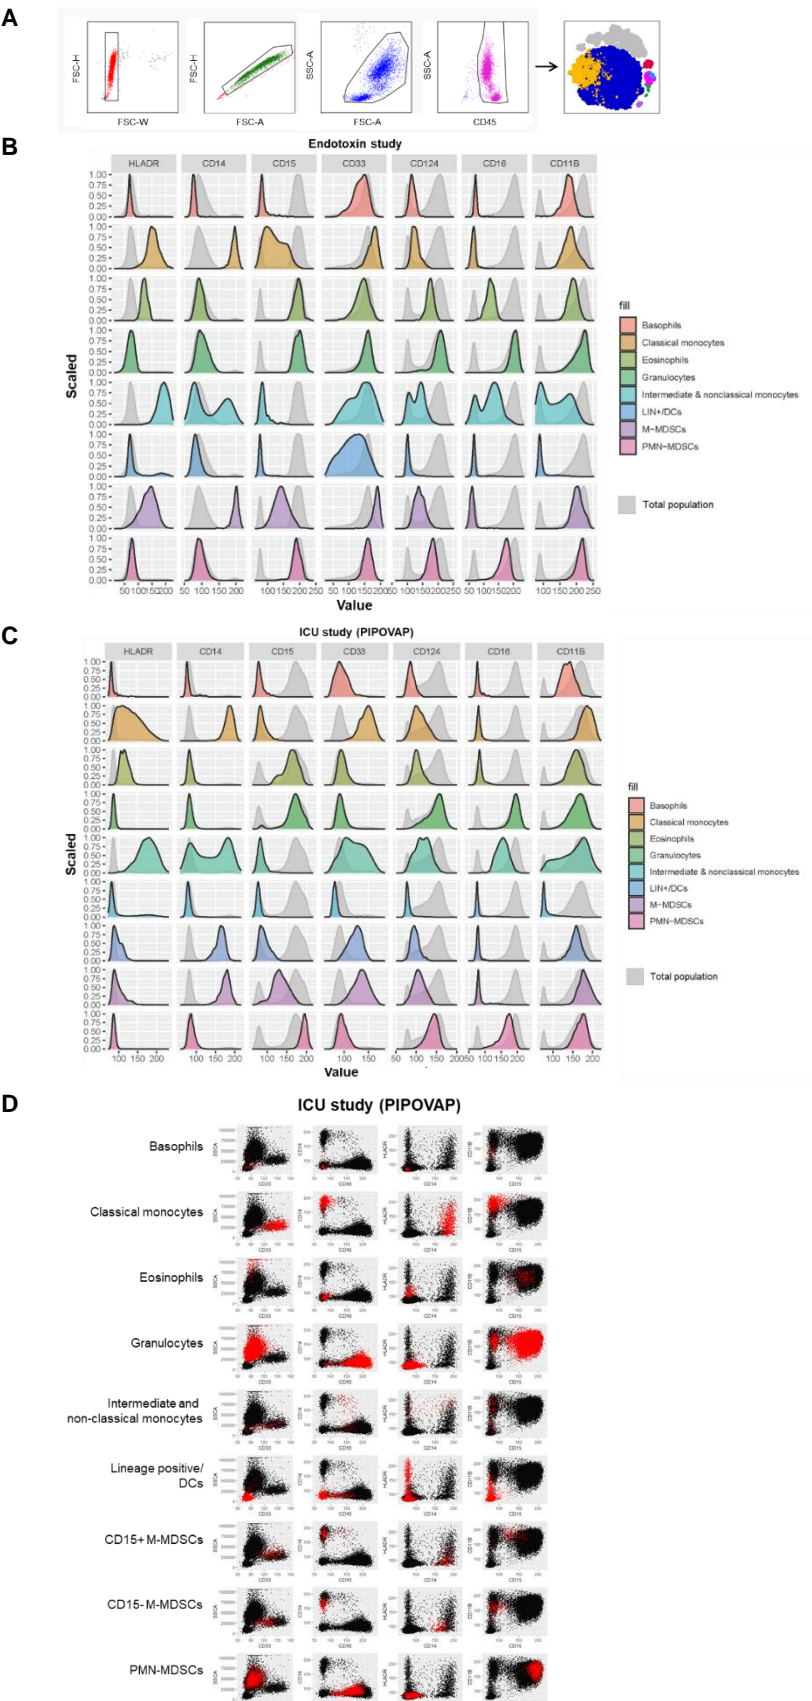

**Figure S1.** Gating strategy of flow cytometry data to exclude debris, doublets and CD45- non-hematopoietic cells (A), univariate histogram plots of cell surface marker expression by whole blood cells from the endotoxemia study (B) and ICU study (C) study, and back-gating of samples from ICU study (D).

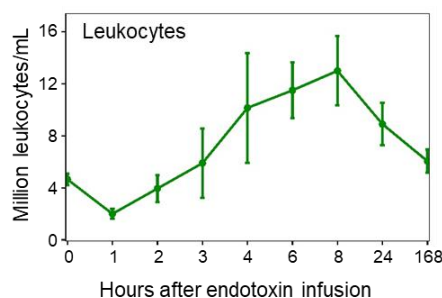

**Figure S2. Leukocyte counts in the blood of healthy subjects infused with endotoxin.** Eight healthy subjects were infused with 2 ng/kg endotoxin. Blood was collected just before (0) and 1, 2, 3, 4, 6, 8, 24 and 168 hours after endotoxin infusion. CD45<sup>+</sup> cells were quantified by flow cytometry as described in *Materials and Methods*, and data expressed as millions of leukocytes/mL of blood. **Left)** The graph shows medians with standard deviations. **Right)** Data are medians and interquartile ranges (IQR).

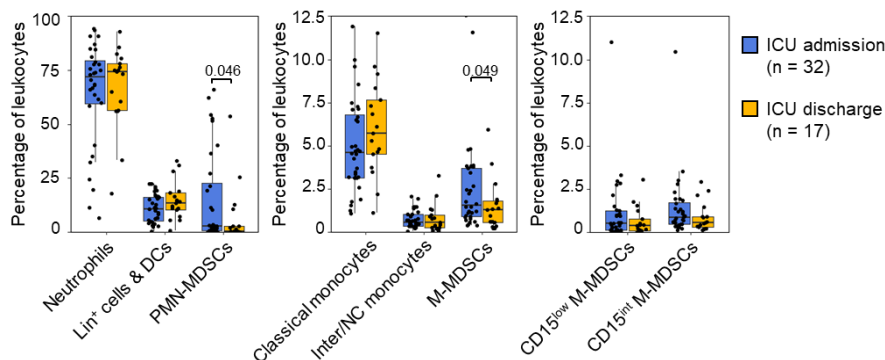

**Figure S3. MDSC-like cells in non-infectious mechanically ventilated ICU patients.** Blood was collected at ICU admission (n = 32) and at ICU discharge (n = 17) from mechanically ventilated ICU patients without infection and analyzed by flow cytometry and unsupervised clustering as described in **Figure 1**. Data are expressed as the percentage in leukocytes of neutrophils, lineage positive (lin<sup>+</sup>) cells and dendritic cells (DCs), polymorphonuclear MDSCs (PMN-MDSCs), classical monocytes, intermediate/non-classical (inter/NC) monocytes, monocytic MDSCs (M-MDSCs), and CD15<sup>low</sup> and CD15<sup>intermediate</sup> (CD15<sup>int</sup>) M-MDSCs. Boxplots show medians and upper and lower quartiles. The whiskers show 5 to 95 percentiles. Each dot represents an individual sample. \* P < 0.05.

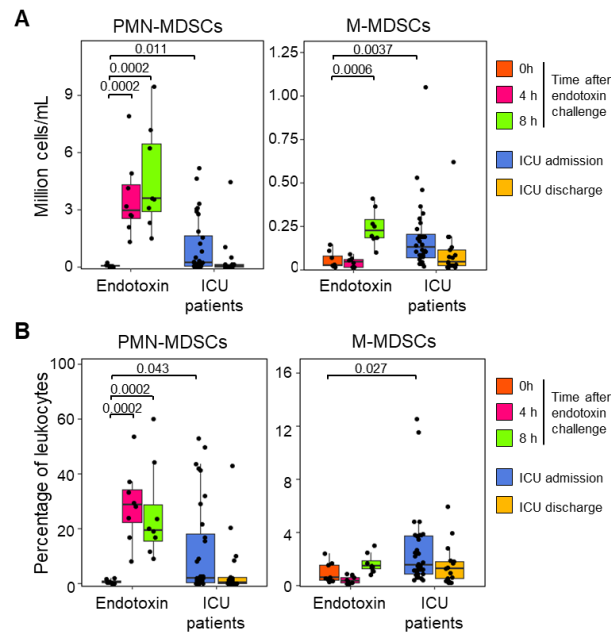

**Figure S4. Comparison of MDSC-like cells levels between healthy subjects challenged with endotoxin and ICU patients.** Absolute counts (A) and percentages (B) of PMN-MDSCs and M-MDSCs in healthy subjects (n = 8) infused for 0, 4 and 8 hours with endotoxin, and in ICU patients at study inclusion (n = 32) and at ICU discharge (n = 17). Boxplots show medians and upper and lower quartiles. The whiskers show 5 to 95 percentiles. \*,  $P < 0.05$ ; \*\*,  $P \leq 0.01$ ; \*\*\*,  $P \leq 0.001$  (healthy patients before endotoxin challenge versus other groups of subjects).

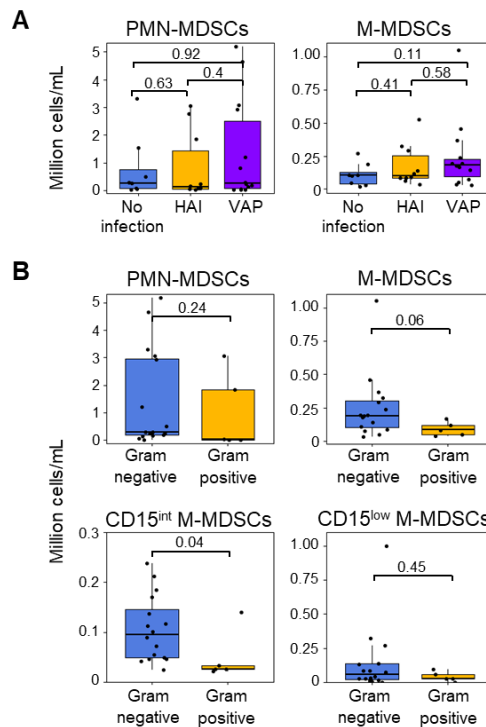

**Figure S5. Absolute counts of MDSC-like cells in relation with the development of infection in mechanically ventilated ICU patients.** A) PMN-MDSCs and M-MDSCs in patients who did not develop an infection (No HAI, n = 8), and in patients who developed hospital-acquired infection (HAI, other than ventilator-associated pneumonia-VAP, n = 10) and VAP (n = 14). B) PMN-MDSCs, M-MDSCs, CD15<sup>int</sup> M-MDSCs and CD15<sup>low</sup> M-MDSCs at ICU admission in patients who subsequently developed Gram-negative or Gram-positive bacterial infections. Boxplots show medians and upper and lower quartiles. The whiskers show 5 to 95 percentiles. Each dot represents an individual sample.

Table S1

Healthy volunteers challenged with with 2 ng/kg of LPS  
Cell counts in blood

|                      |                                |                  |                  |                 |                  |                 |                     |                     |                                        |                                        |                  |                 |
|----------------------|--------------------------------|------------------|------------------|-----------------|------------------|-----------------|---------------------|---------------------|----------------------------------------|----------------------------------------|------------------|-----------------|
| Healthy volunteer #1 | Hours post endotoxin challenge | Leukocytes       | Neutrophils      | Neutrophils     | PMN-MDSCs        | PMN-MDSCs       | Classical monocytes | Classical monocytes | Intermediate & non-classical monocytes | Intermediate & non-classical monocytes | M-MDSCs          | M-MDSCs         |
|                      |                                | Million cells/mL | Million cells/mL | % of leukocytes | Million cells/mL | % of leukocytes | Million cells/mL    | % of leukocytes     | Million cells/mL                       | % of leukocytes                        | Million cells/mL | % of leukocytes |
|                      | 0                              | 4.80             | 2.19             | 45.59           | 0.02             | 0.31            | 0.28                | 5.92                | 0.07                                   | 1.36                                   | 0.03             | 0.62            |
|                      | 1                              | 1.70             | 0.41             | 23.89           | 0.01             | 0.39            | 0.00                | 0.21                | 0.04                                   | 2.65                                   | 0.00             | 0.02            |
|                      | 2                              | 3.90             | 2.45             | 62.91           | 0.48             | 12.43           | 0.00                | 0.00                | 0.01                                   | 0.35                                   | 0.00             | 0.00            |
|                      | 3                              | 5.50             | 4.00             | 72.72           | 0.88             | 16.03           | 0.00                | 0.01                | 0.02                                   | 0.30                                   | 0.00             | 0.03            |
|                      | 4                              | 9.00             | 5.16             | 57.37           | 3.16             | 35.15           | 0.03                | 0.30                | 0.03                                   | 0.34                                   | 0.05             | 0.58            |
|                      | 6                              | 10.90            | 7.71             | 70.74           | 2.31             | 21.23           | 0.18                | 1.64                | 0.04                                   | 0.40                                   | 0.19             | 1.70            |
|                      | 8                              | 10.20            | 7.64             | 74.92           | 1.48             | 14.49           | 0.18                | 1.76                | 0.04                                   | 0.42                                   | 0.25             | 2.45            |
|                      | 24                             | x                | x                | x               | x                | x               | x                   | x                   | x                                      | x                                      | x                | x               |
|                      | 168                            | 5.90             | 2.63             | 44.57           | 0.02             | 0.25            | 0.31                | 5.23                | 0.08                                   | 1.28                                   | 0.01             | 0.24            |
| Healthy volunteer #2 | Hours post endotoxin challenge | Leukocytes       | Neutrophils      | Neutrophils     | PMN-MDSCs        | PMN-MDSCs       | Classical monocytes | Classical monocytes | Intermediate & non-classical monocytes | Intermediate & non-classical monocytes | M-MDSCs          | M-MDSCs         |
|                      |                                | Million cells/mL | Million cells/mL | % of leukocytes | Million cells/mL | % of leukocytes | Million cells/mL    | % of leukocytes     | Million cells/mL                       | % of leukocytes                        | Million cells/mL | % of leukocytes |
|                      | 0                              | 4.50             | 2.06             | 45.88           | 0.02             | 0.49            | 0.13                | 2.95                | 0.05                                   | 1.21                                   | 0.07             | 1.53            |
|                      | 1                              | 2.00             | 0.47             | 23.37           | 0.01             | 0.57            | 0.00                | 0.00                | 0.03                                   | 1.47                                   | 0.00             | 0.00            |
|                      | 2                              | 4.00             | 1.56             | 38.91           | 1.37             | 34.37           | 0.00                | 0.00                | 0.01                                   | 0.25                                   | 0.00             | 0.00            |
|                      | 3                              | 3.90             | 1.89             | 48.56           | 1.47             | 37.73           | 0.00                | 0.00                | 0.01                                   | 0.29                                   | 0.00             | 0.00            |
|                      | 4                              | 6.60             | 3.44             | 52.06           | 2.75             | 41.68           | 0.00                | 0.02                | 0.02                                   | 0.28                                   | 0.01             | 0.15            |
|                      | 6                              | 10.30            | 5.57             | 54.08           | 4.15             | 40.31           | 0.04                | 0.37                | 0.03                                   | 0.34                                   | 0.12             | 1.17            |
|                      | 8                              | 13.00            | 4.90             | 37.66           | 7.20             | 55.40           | 0.05                | 0.39                | 0.04                                   | 0.30                                   | 0.18             | 1.38            |
|                      | 24                             | 9.80             | 4.67             | 47.60           | 0.28             | 2.85            | 0.50                | 5.11                | 0.10                                   | 1.06                                   | 0.08             | 0.78            |
|                      | 168                            | 6.30             | 4.05             | 64.29           | 0.38             | 5.96            | 0.14                | 2.23                | 0.04                                   | 0.71                                   | 0.07             | 1.05            |
| Healthy volunteer #3 | Hours post endotoxin challenge | Leukocytes       | Neutrophils      | Neutrophils     | PMN-MDSCs        | PMN-MDSCs       | Classical monocytes | Classical monocytes | Intermediate & non-classical monocytes | Intermediate & non-classical monocytes | M-MDSCs          | M-MDSCs         |
|                      |                                | Million cells/mL | Million cells/mL | % of leukocytes | Million cells/mL | % of leukocytes | Million cells/mL    | % of leukocytes     | Million cells/mL                       | % of leukocytes                        | Million cells/mL | % of leukocytes |
|                      | 0                              | 7.50             | 4.24             | 56.53           | 0.04             | 0.51            | 0.51                | 6.82                | 0.06                                   | 0.75                                   | 0.02             | 0.28            |
|                      | 1                              | 3.20             | 1.41             | 44.04           | 0.03             | 0.91            | 0.00                | 0.00                | 0.04                                   | 1.18                                   | 0.00             | 0.00            |
|                      | 2                              | 5.10             | 3.57             | 70.05           | 0.46             | 9.02            | 0.00                | 0.03                | 0.02                                   | 0.33                                   | 0.01             | 0.13            |
|                      | 3                              | 8.40             | 6.74             | 80.24           | 0.98             | 11.66           | 0.00                | 0.03                | 0.02                                   | 0.21                                   | 0.01             | 0.10            |
|                      | 4                              | 13.00            | 11.08            | 85.24           | 1.31             | 10.09           | 0.02                | 0.14                | 0.03                                   | 0.24                                   | 0.02             | 0.13            |
|                      | 6                              | 15.80            | 12.85            | 81.30           | 2.19             | 13.84           | 0.16                | 1.01                | 0.04                                   | 0.25                                   | 0.14             | 0.89            |
|                      | 8                              | 20.30            | 16.61            | 81.82           | 2.32             | 11.41           | 0.34                | 1.66                | 0.05                                   | 0.23                                   | 0.27             | 1.31            |
|                      | 24                             | 12.20            | 6.83             | 55.98           | 0.10             | 0.80            | 0.71                | 5.79                | 0.10                                   | 0.85                                   | 0.06             | 0.48            |
|                      | 168                            | 7.00             | 4.87             | 69.59           | 0.03             | 0.36            | 0.23                | 3.26                | 0.04                                   | 0.51                                   | 0.04             | 0.57            |
| Healthy volunteer #4 | Hours post endotoxin challenge | Leukocytes       | Neutrophils      | Neutrophils     | PMN-MDSCs        | PMN-MDSCs       | Classical monocytes | Classical monocytes | Intermediate & non-classical monocytes | Intermediate & non-classical monocytes | M-MDSCs          | M-MDSCs         |
|                      |                                | Million cells/mL | Million cells/mL | % of leukocytes | Million cells/mL | % of leukocytes | Million cells/mL    | % of leukocytes     | Million cells/mL                       | % of leukocytes                        | Million cells/mL | % of leukocytes |
|                      | 0                              | 8.80             | 5.79             | 65.79           | 0.23             | 2.67            | 0.33                | 3.71                | 0.02                                   | 0.19                                   | 0.15             | 1.65            |
|                      | 1                              | 3.00             | 1.76             | 58.50           | 0.05             | 1.79            | 0.00                | 0.00                | 0.01                                   | 0.24                                   | 0.00             | 0.00            |
|                      | 2                              | 7.30             | 3.99             | 54.71           | 2.44             | 33.47           | 0.00                | 0.00                | 0.01                                   | 0.10                                   | 0.00             | 0.04            |
|                      | 3                              | 12.70            | 7.91             | 62.30           | 4.44             | 34.93           | 0.00                | 0.02                | 0.01                                   | 0.05                                   | 0.01             | 0.11            |
|                      | 4                              | 17.10            | 8.77             | 51.28           | 7.93             | 46.40           | 0.04                | 0.21                | 0.01                                   | 0.06                                   | 0.06             | 0.37            |
|                      | 6                              | 23.80            | 16.36            | 68.74           | 6.72             | 28.23           | 0.21                | 0.89                | 0.01                                   | 0.05                                   | 0.21             | 0.89            |
|                      | 8                              | 24.80            | 17.41            | 70.21           | 6.22             | 25.08           | 0.32                | 1.30                | 0.01                                   | 0.05                                   | 0.41             | 1.64            |
|                      | 24                             | 13.60            | 9.21             | 67.69           | 0.29             | 2.15            | 0.57                | 4.19                | 0.02                                   | 0.18                                   | 0.40             | 2.91            |
|                      | 168                            | 12.70            | 8.89             | 69.96           | 0.38             | 3.00            | 0.42                | 3.34                | 0.02                                   | 0.17                                   | 0.08             | 0.62            |
| Healthy volunteer #5 | Hours post endotoxin challenge | Leukocytes       | Neutrophils      | Neutrophils     | PMN-MDSCs        | PMN-MDSCs       | Classical monocytes | Classical monocytes | Intermediate & non-classical monocytes | Intermediate & non-classical monocytes | M-MDSCs          | M-MDSCs         |
|                      |                                | Million cells/mL | Million cells/mL | % of leukocytes | Million cells/mL | % of leukocytes | Million cells/mL    | % of leukocytes     | Million cells/mL                       | % of leukocytes                        | Million cells/mL | % of leukocytes |
|                      | 0                              | 5.00             | 2.73             | 54.67           | 0.05             | 1.06            | 0.29                | 5.75                | 0.05                                   | 1.03                                   | 0.02             | 0.44            |
|                      | 1                              | 2.00             | 0.86             | 43.02           | 0.12             | 5.86            | 0.00                | 0.00                | 0.03                                   | 1.67                                   | 0.00             | 0.00            |
|                      | 2                              | 3.70             | 1.04             | 28.15           | 1.91             | 51.58           | 0.00                | 0.00                | 0.01                                   | 0.32                                   | 0.00             | 0.00            |
|                      | 3                              | 4.90             | 2.17             | 44.31           | 2.29             | 46.81           | 0.00                | 0.04                | 0.01                                   | 0.30                                   | 0.00             | 0.07            |
|                      | 4                              | 7.30             | 1.97             | 26.95           | 4.90             | 67.14           | 0.02                | 0.29                | 0.02                                   | 0.29                                   | 0.02             | 0.21            |
|                      | 6                              | 10.40            | 6.22             | 59.82           | 3.55             | 34.15           | 0.14                | 1.37                | 0.04                                   | 0.35                                   | 0.08             | 0.75            |
|                      | 8                              | 12.60            | 2.01             | 15.96           | 9.49             | 75.28           | 0.24                | 1.89                | 0.05                                   | 0.42                                   | 0.10             | 0.79            |
|                      | 24                             | 8.10             | 3.91             | 48.22           | 0.10             | 1.20            | 0.52                | 6.36                | 0.11                                   | 1.36                                   | 0.06             | 0.78            |
|                      | 168                            | 5.70             | 3.76             | 65.98           | 0.17             | 3.03            | 0.22                | 3.79                | 0.05                                   | 0.93                                   | 0.00             | 0.09            |
| Healthy volunteer #6 | Hours post endotoxin challenge | Leukocytes       | Neutrophils      | Neutrophils     | PMN-MDSCs        | PMN-MDSCs       | Classical monocytes | Classical monocytes | Intermediate & non-classical monocytes | Intermediate & non-classical monocytes | M-MDSCs          | M-MDSCs         |
|                      |                                | Million cells/mL | Million cells/mL | % of leukocytes | Million cells/mL | % of leukocytes | Million cells/mL    | % of leukocytes     | Million cells/mL                       | % of leukocytes                        | Million cells/mL | % of leukocytes |
|                      | 0                              | 4.10             | 2.14             | 52.12           | 0.03             | 0.63            | 0.18                | 4.50                | 0.06                                   | 1.39                                   | 0.02             | 0.55            |
|                      | 1                              | 1.60             | 0.61             | 38.20           | 0.01             | 0.67            | 0.00                | 0.01                | 0.04                                   | 2.39                                   | 0.00             | 0.00            |
|                      | 2                              | 3.90             | 2.28             | 58.34           | 0.83             | 21.39           | 0.00                | 0.04                | 0.02                                   | 0.44                                   | 0.01             | 0.25            |
|                      | 3                              | 6.30             | 3.70             | 58.80           | 2.11             | 33.46           | 0.01                | 0.13                | 0.02                                   | 0.36                                   | 0.02             | 0.34            |
|                      | 4                              | 11.30            | 6.55             | 57.99           | 4.14             | 36.63           | 0.08                | 0.67                | 0.03                                   | 0.29                                   | 0.09             | 0.78            |
|                      | 6                              | 12.10            | 7.53             | 62.23           | 3.78             | 31.21           | 0.24                | 1.99                | 0.04                                   | 0.30                                   | 0.18             | 1.49            |
|                      | 8                              | 13.00            | 8.77             | 67.44           | 3.09             | 23.79           | 0.38                | 2.93                | 0.04                                   | 0.31                                   | 0.20             | 1.50            |
|                      | 24                             | 7.80             | 4.25             | 54.51           | 0.03             | 0.41            | 0.36                | 4.63                | 0.10                                   | 1.32                                   | 0.03             | 0.43            |
|                      | 168                            | 5.20             | 3.55             | 68.30           | 0.15             | 2.89            | 0.20                | 3.87                | 0.05                                   | 0.95                                   | 0.01             | 0.17            |
| Healthy volunteer #7 | Hours post endotoxin challenge | Leukocytes       | Neutrophils      | Neutrophils     | PMN-MDSCs        | PMN-MDSCs       | Classical monocytes | Classical monocytes | Intermediate & non-classical monocytes | Intermediate & non-classical monocytes | M-MDSCs          | M-MDSCs         |
|                      |                                | Million cells/mL | Million cells/mL | % of leukocytes | Million cells/mL | % of leukocytes | Million cells/mL    | % of leukocytes     | Million cells/mL                       | % of leukocytes                        | Million cells/mL | % of leukocytes |
|                      | 0                              | 4.40             | 2.51             | 57.01           | 0.01             | 0.23            | 0.28                | 6.36                | 0.02                                   | 0.37                                   | 0.02             | 0.37            |
|                      | 1                              | 2.20             | 1.17             | 53.34           | 0.01             | 0.45            | 0.00                | 0.00                | 0.01                                   | 0.50                                   | 0.00             | 0.00            |
|                      | 2                              | 5.20             | 3.49             | 67.16           | 0.75             | 14.37           | 0.00                | 0.05                | 0.01                                   | 0.14                                   | 0.01             | 0.16            |
|                      | 3                              | 7.50             | 5.64             | 75.24           | 1.40             | 18.61           | 0.00                | 0.06                | 0.01                                   | 0.10                                   | 0.01             | 0.11            |
|                      | 4                              | 12.60            | 9.46             | 75.09           | 2.67             | 21.17           | 0.03                | 0.22                | 0.01                                   | 0.06                                   | 0.04             | 0.32            |
|                      | 6                              | 16.80            | 13.19            | 78.51           | 2.73             | 16.28           | 0.26                | 1.53                | 0.01                                   | 0.05                                   | 0.18             | 1.06            |
|                      | 8                              | 16.70            | 11.63            | 69.67           | 3.55             | 21.24           | 0.51                | 3.05                | 0.01                                   | 0.07                                   | 0.18             | 1.09            |
|                      | 24                             | 8.90             | 4.90             | 55.04           | 0.04             | 0.44            | 0.31                | 3.44                | 0.03                                   | 0.30                                   | 0.01             | 0.15            |
|                      | 168                            | 6.20             | 3.88             | 62.61           | 0.07             | 1.21            | 0.25                | 4.01                | 0.02                                   | 0.30                                   | 0.01             | 0.20            |
| Healthy volunteer #8 | Hours post endotoxin challenge | Leukocytes       | Neutrophils      | Neutrophils     | PMN-MDSCs        | PMN-MDSCs       | Classical monocytes | Classical monocytes | Intermediate & non-classical monocytes | Intermediate & non-classical monocytes | M-MDSCs          | M-MDSCs         |
|                      |                                | Million cells/mL | Million cells/mL | % of leukocytes | Million cells/mL | % of leukocytes | Million cells/mL    | % of leukocytes     | Million cells/mL                       | % of leukocytes                        | Million cells/mL | % of leukocytes |
|                      | 0                              | 4.50             | 2.38             | 52.98           | 0.11             | 2.34            | 0.20                | 4.40                | 0.07                                   | 1.55                                   | 0.11             | 2.39            |
|                      | 1                              | 2.00             | 0.72             | 36.23           | 0.02             | 0.81            | 0.00                | 0.00                | 0.05                                   | 2.65                                   | 0.00             | 0.00            |
|                      | 2                              | 2.60             | 1.27             | 48.83           | 0.54             | 20.90           | 0.00                | 0.00                | 0.02                                   | 0.68                                   | 0.00             | 0.03            |
|                      | 3                              | 3.50             | 2.11             | 60.18           | 1.08             | 30.87           | 0.00                | 0.04                | 0.02                                   | 0.52                                   | 0.02             | 0.45            |
|                      | 4                              | 7.00             | 4.51             | 64.46           | 2.11             | 30.08           | 0.01                | 0.12                | 0.04                                   | 0.52                                   | 0.06             | 0.86            |
|                      | 6                              | 9.80             | 4.99             | 50.92           | 4.29             | 43.78           | 0.06                | 0.58                | 0.05                                   | 0.49                                   | 0.12             | 1.24            |
|                      | 8                              | 12.20            | 7.42             | 60.80           | 3.61             | 29.60           | 0.13                | 1.10                | 0.06                                   | 0.50                                   | 0.36             | 2.98            |
|                      | 24                             | 7.40             | 3.03             | 40.98           | 0.04             | 0.59            | 0.21                | 2.83                | 0.10                                   | 1.33                                   | 0.27             | 3.71            |

|                                                  |                                |                               |                  |                  |                  |                  |                     |                     |                                        |                                        |                                        |                  |                 |
|--------------------------------------------------|--------------------------------|-------------------------------|------------------|------------------|------------------|------------------|---------------------|---------------------|----------------------------------------|----------------------------------------|----------------------------------------|------------------|-----------------|
| 1684.202.4658.600.143.360.184.230.051.140.030.80 |                                |                               |                  |                  |                  |                  |                     |                     |                                        |                                        |                                        |                  |                 |
| x : not available                                |                                |                               |                  |                  |                  |                  |                     |                     |                                        |                                        |                                        |                  |                 |
| Mean of 8 healthy volunteers                     | Hours post endotoxin infusion  | Leukocytes                    | Neutrophils      | Neutrophils      | PMN-MDSCs        | PMN-MDSCs        | Classical monocytes | Classical monocytes | Intermediate & non-classical monocytes | Intermediate & non-classical monocytes | M-MDSCs                                | M-MDSCs          |                 |
|                                                  |                                | Million cells/mL              | Million cells/mL | % of leukocytes  | Million cells/mL | % of leukocytes  | Million cells/mL    | % of leukocytes     | Million cells/mL                       | % of leukocytes                        | Million cells/mL                       | % of leukocytes  |                 |
|                                                  | 0                              | 5.45                          | 3.01             | 53.82            | 0.06             | 1.03             | 0.28                | 5.05                | 0.05                                   | 0.98                                   | 0.05                                   | 0.98             |                 |
|                                                  | 1                              | 2.21                          | 0.93             | 40.07            | 0.03             | 1.43             | 0.00                | 0.03                | 0.03                                   | 1.59                                   | 0.00                                   | 0.00             |                 |
|                                                  | 2                              | 4.46                          | 2.46             | 53.63            | 1.10             | 24.69            | 0.00                | 0.02                | 0.01                                   | 0.33                                   | 0.00                                   | 0.08             |                 |
|                                                  | 3                              | 6.59                          | 4.27             | 62.80            | 1.83             | 28.76            | 0.00                | 0.04                | 0.01                                   | 0.27                                   | 0.01                                   | 0.15             |                 |
|                                                  | 4                              | 10.49                         | 6.37             | 58.81            | 3.62             | 36.04            | 0.03                | 0.25                | 0.02                                   | 0.26                                   | 0.04                                   | 0.43             |                 |
|                                                  | 6                              | 13.74                         | 9.30             | 65.79            | 3.72             | 28.63            | 0.16                | 1.17                | 0.03                                   | 0.28                                   | 0.15                                   | 1.15             |                 |
|                                                  | 8                              | 15.35                         | 9.55             | 59.81            | 4.62             | 32.04            | 0.27                | 1.76                | 0.04                                   | 0.29                                   | 0.24                                   | 1.64             |                 |
|                                                  | 24                             | 9.69                          | 5.26             | 52.86            | 0.13             | 1.21             | 0.45                | 4.62                | 0.08                                   | 0.92                                   | 0.13                                   | 1.32             |                 |
|                                                  | 168                            | 6.65                          | 4.26             | 62.99            | 0.17             | 2.51             | 0.24                | 3.75                | 0.04                                   | 0.75                                   | 0.03                                   | 0.47             |                 |
|                                                  | Median of 8 healthy volunteers | Hours post endotoxin infusion | Leukocytes       | Neutrophils      | Neutrophils      | PMN-MDSCs        | PMN-MDSCs           | Classical monocytes | Classical monocytes                    | Intermediate & non-classical monocytes | Intermediate & non-classical monocytes | M-MDSCs          | M-MDSCs         |
|                                                  |                                |                               | Million cells/mL | Million cells/mL | % of leukocytes  | Million cells/mL | % of leukocytes     | Million cells/mL    | % of leukocytes                        | Million cells/mL                       | % of leukocytes                        | Million cells/mL | % of leukocytes |
| 0                                                |                                | 4.65                          | 2.45             | 53.82            | 0.03             | 0.57             | 0.28                | 5.12                | 0.06                                   | 1.12                                   | 0.03                                   | 0.58             |                 |
| 1                                                |                                | 2.00                          | 0.79             | 40.61            | 0.01             | 0.74             | 0.00                | 0.00                | 0.04                                   | 1.57                                   | 0.00                                   | 0.00             |                 |
| 2                                                |                                | 3.95                          | 2.36             | 56.52            | 0.79             | 21.14            | 0.00                | 0.00                | 0.01                                   | 0.33                                   | 0.00                                   | 0.04             |                 |
| 3                                                |                                | 5.90                          | 3.85             | 61.24            | 1.43             | 32.17            | 0.00                | 0.03                | 0.02                                   | 0.29                                   | 0.01                                   | 0.10             |                 |
| 4                                                |                                | 10.15                         | 5.86             | 57.68            | 2.96             | 35.89            | 0.02                | 0.22                | 0.03                                   | 0.28                                   | 0.05                                   | 0.35             |                 |
| 6                                                |                                | 11.50                         | 7.62             | 65.49            | 3.66             | 29.72            | 0.17                | 1.19                | 0.04                                   | 0.32                                   | 0.16                                   | 1.11             |                 |
| 8                                                |                                | 13.00                         | 8.20             | 68.55            | 3.58             | 24.43            | 0.28                | 1.71                | 0.04                                   | 0.31                                   | 0.22                                   | 1.44             |                 |
| 24                                               |                                | 8.90                          | 4.67             | 54.51            | 0.10             | 0.80             | 0.50                | 4.63                | 0.10                                   | 1.06                                   | 0.06                                   | 0.78             |                 |
| 168                                              |                                | 6.05                          | 3.82             | 65.14            | 0.15             | 2.94             | 0.22                | 3.83                | 0.05                                   | 0.82                                   | 0.02                                   | 0.40             |                 |
| SD of 8 healthy volunteers                       |                                | Hours post endotoxin infusion | Leukocytes       | Neutrophils      | Neutrophils      | PMN-MDSCs        | PMN-MDSCs           | Classical monocytes | Classical monocytes                    | Intermediate & non-classical monocytes | Intermediate & non-classical monocytes | M-MDSCs          | M-MDSCs         |
|                                                  |                                |                               | Million cells/mL | Million cells/mL | % of leukocytes  | Million cells/mL | % of leukocytes     | Million cells/mL    | % of leukocytes                        | Million cells/mL                       | % of leukocytes                        | Million cells/mL | % of leukocytes |
|                                                  | 0                              | 1.72                          | 1.33             | 6.50             | 0.08             | 0.95             | 0.12                | 1.36                | 0.02                                   | 0.50                                   | 0.05                                   | 0.77             |                 |
|                                                  | 1                              | 0.58                          | 0.48             | 12.53            | 0.04             | 1.84             | 0.00                | 0.07                | 0.02                                   | 0.93                                   | 0.00                                   | 0.01             |                 |
|                                                  | 2                              | 1.41                          | 1.13             | 14.40            | 0.74             | 14.25            | 0.00                | 0.02                | 0.00                                   | 0.18                                   | 0.00                                   | 0.09             |                 |
|                                                  | 3                              | 2.98                          | 2.28             | 12.68            | 1.17             | 12.12            | 0.00                | 0.04                | 0.01                                   | 0.15                                   | 0.01                                   | 0.16             |                 |
|                                                  | 4                              | 3.68                          | 3.17             | 17.38            | 2.07             | 17.06            | 0.02                | 0.19                | 0.01                                   | 0.15                                   | 0.03                                   | 0.29             |                 |
|                                                  | 6                              | 4.84                          | 4.23             | 10.97            | 1.46             | 10.89            | 0.08                | 0.56                | 0.01                                   | 0.16                                   | 0.04                                   | 0.32             |                 |
|                                                  | 8                              | 4.94                          | 5.39             | 22.01            | 2.74             | 22.00            | 0.15                | 0.89                | 0.02                                   | 0.16                                   | 0.10                                   | 0.73             |                 |
|                                                  | 24                             | 4.06                          | 2.69             | 20.26            | 0.11             | 0.97             | 0.22                | 2.00                | 0.05                                   | 0.56                                   | 0.14                                   | 1.37             |                 |
|                                                  | 168                            | 2.58                          | 2.02             | 8.36             | 0.14             | 1.88             | 0.09                | 0.86                | 0.02                                   | 0.40                                   | 0.03                                   | 0.35             |                 |



Healthy volunteers challenged with with 2 ng/kg of LPS  
Cell counts in blood

| Healthy volunteer # | Hours post<br>endotoxin<br>challenge | Leukocytes       | Neutrophils      | Neutrophils     | PMN-MDSCs        | PMN-MDSCs       | Classical<br>monocytes | Classical<br>monocytes | Intermediate &<br>non-classical<br>monocytes | Intermediate &<br>non-classical<br>monocytes | Total monocytes  | M-MDSCs          | M-MDSCs         | Total monocytic<br>cells | Classical<br>monocytes  | Intermediate &<br>non-classical<br>monocytes | M-MDSCs                 | Total %                 |
|---------------------|--------------------------------------|------------------|------------------|-----------------|------------------|-----------------|------------------------|------------------------|----------------------------------------------|----------------------------------------------|------------------|------------------|-----------------|--------------------------|-------------------------|----------------------------------------------|-------------------------|-------------------------|
|                     |                                      | Million cells/mL | Million cells/mL | % of leukocytes | Million cells/mL | % of leukocytes | Million cells/mL       | % of leukocytes        | Million cells/mL                             | % of leukocytes                              | Million cells/mL | Million cells/mL | % of leukocytes | Million cells/mL         | % of monocytic<br>cells | % of monocytic<br>cells                      | % of monocytic<br>cells | % of monocytic<br>cells |
| 1                   | 0                                    | 4.800            | 2.188            | 45.593          | 0.015            | 0.313           | 0.284                  | 5.924                  | 0.065                                        | 1.357                                        | 0.350            | 0.030            | 0.621           | 0.379                    | 74.96                   | 17.18                                        | 7.86                    | 100.00                  |
| 2                   | 0                                    | 4.500            | 2.064            | 45.877          | 0.022            | 0.487           | 0.133                  | 2.950                  | 0.055                                        | 1.213                                        | 0.187            | 0.069            | 1.534           | 0.256                    | 51.79                   | 21.29                                        | 26.92                   | 100.00                  |
| 3                   | 0                                    | 7.500            | 4.240            | 56.533          | 0.038            | 0.506           | 0.512                  | 6.824                  | 0.056                                        | 0.748                                        | 0.568            | 0.021            | 0.284           | 0.589                    | 86.87                   | 9.52                                         | 3.61                    | 100.00                  |
| 4                   | 0                                    | 8.800            | 5.790            | 65.794          | 0.235            | 2.669           | 0.327                  | 3.713                  | 0.017                                        | 0.193                                        | 0.344            | 0.145            | 1.648           | 0.489                    | 66.86                   | 3.47                                         | 29.67                   | 100.00                  |
| 5                   | 0                                    | 5.000            | 2.734            | 54.671          | 0.053            | 1.062           | 0.287                  | 5.745                  | 0.051                                        | 1.029                                        | 0.339            | 0.022            | 0.443           | 0.361                    | 79.60                   | 14.26                                        | 6.14                    | 100.00                  |
| 6                   | 0                                    | 4.100            | 2.137            | 52.120          | 0.026            | 0.631           | 0.184                  | 4.495                  | 0.057                                        | 1.395                                        | 0.241            | 0.022            | 0.547           | 0.264                    | 69.84                   | 21.67                                        | 8.50                    | 100.00                  |
| 7                   | 0                                    | 4.400            | 2.509            | 57.013          | 0.010            | 0.227           | 0.280                  | 6.356                  | 0.016                                        | 0.370                                        | 0.296            | 0.016            | 0.370           | 0.312                    | 89.57                   | 5.22                                         | 5.21                    | 100.00                  |
| 8                   | 0                                    | 4.500            | 2.384            | 52.977          | 0.105            | 2.336           | 0.198                  | 4.397                  | 0.070                                        | 1.546                                        | 0.267            | 0.107            | 2.386           | 0.375                    | 52.79                   | 18.56                                        | 28.65                   | 100.00                  |
| Median              |                                      | 4.650            | 2.446            | 53.824          | 0.032            | 0.569           | 0.282                  | 5.120                  | 0.055                                        | 1.121                                        | 0.317            | 0.026            | 0.584           | 0.368                    | 72.400                  | 15.718                                       | 8.177                   |                         |
| Mean                |                                      | 5.450            | 3.006            | 53.822          | 0.063            | 1.029           | 0.276                  | 5.051                  | 0.048                                        | 0.981                                        | 0.324            | 0.054            | 0.979           | 0.378                    | 71.534                  | 13.895                                       | 14.571                  | 100.00                  |
| SD                  |                                      | 1.723            | 1.325            | 6.503           | 0.076            | 0.947           | 0.116                  | 1.365                  | 0.020                                        | 0.498                                        | 0.114            | 0.048            | 0.774           | 0.113                    | 14.157                  | 7.080                                        | 11.585                  |                         |
| Q1 IQR              |                                      | 4.475            | 2.176            | 50.559          | 0.020            | 0.443           | 0.194                  | 4.226                  | 0.043                                        | 0.654                                        | 0.261            | 0.022            | 0.425           | 0.300                    | 63.343                  | 8.445                                        | 5.911                   |                         |
| Q3 IQR              |                                      | 5.625            | 3.110            | 56.653          | 0.066            | 1.381           | 0.297                  | 6.032                  | 0.059                                        | 1.367                                        | 0.345            | 0.079            | 1.562           | 0.407                    | 81.416                  | 19.242                                       | 27.355                  |                         |
| 1                   | 1                                    | 1.70             | 0.41             | 23.89           | 0.01             | 0.39            | 0.00                   | 0.21                   | 0.04                                         | 2.65                                         | 0.049            | 0.00             | 0.02            | 0.049                    | 7.27                    | 92.11                                        | 0.63                    | 100.00                  |
| 2                   | 1                                    | 2.00             | 0.47             | 23.37           | 0.01             | 0.57            | 0.00                   | 0.00                   | 0.03                                         | 1.47                                         | 0.029            | 0.00             | 0.00            | 0.029                    | 0.00                    | 100.00                                       | 0.00                    | 100.00                  |
| 3                   | 1                                    | 3.20             | 1.41             | 44.04           | 0.03             | 0.91            | 0.00                   | 0.00                   | 0.04                                         | 1.18                                         | 0.038            | 0.00             | 0.00            | 0.038                    | 0.04                    | 99.96                                        | 0.00                    | 100.00                  |
| 4                   | 1                                    | 3.00             | 1.76             | 58.50           | 0.05             | 1.79            | 0.00                   | 0.00                   | 0.01                                         | 0.24                                         | 0.007            | 0.00             | 0.00            | 0.007                    | 0.60                    | 99.40                                        | 0.00                    | 100.00                  |
| 5                   | 1                                    | 2.00             | 0.86             | 43.02           | 0.12             | 5.86            | 0.00                   | 0.00                   | 0.03                                         | 1.67                                         | 0.033            | 0.00             | 0.00            | 0.033                    | 0.20                    | 99.80                                        | 0.00                    | 100.00                  |
| 6                   | 1                                    | 1.60             | 0.61             | 38.20           | 0.01             | 0.67            | 0.00                   | 0.01                   | 0.04                                         | 2.39                                         | 0.038            | 0.00             | 0.00            | 0.038                    | 0.33                    | 99.63                                        | 0.04                    | 100.00                  |
| 7                   | 1                                    | 2.20             | 1.17             | 53.34           | 0.01             | 0.45            | 0.00                   | 0.00                   | 0.01                                         | 0.50                                         | 0.011            | 0.00             | 0.00            | 0.011                    | 0.13                    | 99.87                                        | 0.00                    | 100.00                  |
| 8                   | 1                                    | 2.00             | 0.72             | 36.23           | 0.02             | 0.81            | 0.00                   | 0.00                   | 0.05                                         | 2.65                                         | 0.053            | 0.00             | 0.00            | 0.053                    | 0.00                    | 100.00                                       | 0.00                    | 100.00                  |
| Median              |                                      | 2.000            | 0.793            | 40.609          | 0.014            | 0.737           | 0.000                  | 0.001                  | 0.036                                        | 1.568                                        | 0.036            | 0.000            | 0.000           | 0.036                    | 0.166                   | 99.834                                       | 0.000                   |                         |
| Mean                |                                      | 2.213            | 0.926            | 40.074          | 0.032            | 1.430           | 0.000                  | 0.028                  | 0.032                                        | 1.592                                        | 0.032            | 0.000            | 0.002           | 0.032                    | 1.072                   | 98.845                                       | 0.083                   | 100.00                  |
| SD                  |                                      | 0.582            | 0.479            | 12.533          | 0.038            | 1.845           | 0.001                  | 0.073                  | 0.016                                        | 0.931                                        | 0.016            | 0.000            | 0.006           | 0.016                    | 2.512                   | 2.731                                        | 0.220                   |                         |
| Q1 IQR              |                                      | 1.925            | 0.575            | 33.146          | 0.010            | 0.536           | 0.000                  | 0.000                  | 0.025                                        | 1.012                                        | 0.025            | 0.000            | 0.000           | 0.025                    | 0.032                   | 99.573                                       | 0.000                   |                         |
| Q3 IQR              |                                      | 2.400            | 1.232            | 46.369          | 0.035            | 1.130           | 0.000                  | 0.005                  | 0.040                                        | 2.451                                        | 0.041            | 0.000            | 0.000           | 0.041                    | 0.399                   | 99.968                                       | 0.009                   |                         |
| 1                   | 2                                    | 3.90             | 2.45             | 62.91           | 0.48             | 12.43           | 0.00                   | 0.00                   | 0.01                                         | 0.35                                         | 0.014            | 0.00             | 0.00            | 0.014                    | 0.00                    | 100.00                                       | 0.00                    | 100.00                  |
| 2                   | 2                                    | 4.00             | 1.56             | 38.91           | 1.37             | 34.37           | 0.00                   | 0.00                   | 0.01                                         | 0.25                                         | 0.010            | 0.00             | 0.00            | 0.010                    | 0.34                    | 99.16                                        | 0.50                    | 100.00                  |
| 3                   | 2                                    | 5.10             | 3.57             | 70.05           | 0.46             | 9.02            | 0.00                   | 0.03                   | 0.02                                         | 0.33                                         | 0.019            | 0.01             | 0.13            | 0.025                    | 6.73                    | 67.07                                        | 26.20                   | 100.00                  |
| 4                   | 2                                    | 7.30             | 3.99             | 54.71           | 2.44             | 33.47           | 0.00                   | 0.00                   | 0.01                                         | 0.10                                         | 0.007            | 0.00             | 0.04            | 0.010                    | 3.04                    | 68.21                                        | 28.75                   | 100.00                  |
| 5                   | 2                                    | 3.70             | 1.04             | 28.15           | 1.91             | 51.58           | 0.00                   | 0.00                   | 0.01                                         | 0.32                                         | 0.012            | 0.00             | 0.00            | 0.012                    | 0.00                    | 100.00                                       | 0.00                    | 100.00                  |
| 6                   | 2                                    | 3.90             | 2.28             | 58.34           | 0.83             | 21.39           | 0.00                   | 0.04                   | 0.02                                         | 0.44                                         | 0.019            | 0.01             | 0.25            | 0.028                    | 5.68                    | 60.30                                        | 34.02                   | 100.00                  |
| 7                   | 2                                    | 5.20             | 3.49             | 67.16           | 0.75             | 14.37           | 0.00                   | 0.05                   | 0.01                                         | 0.14                                         | 0.010            | 0.01             | 0.16            | 0.018                    | 15.44                   | 39.54                                        | 45.03                   | 100.00                  |
| 8                   | 2                                    | 2.60             | 1.27             | 48.83           | 0.54             | 20.90           | 0.00                   | 0.00                   | 0.02                                         | 0.68                                         | 0.018            | 0.00             | 0.03            | 0.019                    | 0.36                    | 95.14                                        | 4.50                    | 100.00                  |
| Median              |                                      | 3.950            | 2.364            | 56.524          | 0.791            | 21.142          | 0.000                  | 0.003                  | 0.013                                        | 0.328                                        | 0.013            | 0.002            | 0.036           | 0.016                    | 1.697                   | 81.677                                       | 15.349                  |                         |
| Mean                |                                      | 4.463            | 2.457            | 53.633          | 1.099            | 24.689          | 0.001                  | 0.017                  | 0.013                                        | 0.326                                        | 0.013            | 0.004            | 0.076           | 0.017                    | 3.947                   | 78.678                                       | 17.375                  | 100.00                  |
| SD                  |                                      | 1.409            | 1.130            | 14.397          | 0.739            | 14.250          | 0.001                  | 0.022                  | 0.004                                        | 0.182                                        | 0.004            | 0.004            | 0.092           | 0.007                    | 5.354                   | 23.034                                       | 18.139                  |                         |
| Q1 IQR              |                                      | 3.850            | 1.485            | 46.352          | 0.529            | 13.886          | 0.000                  | 0.001                  | 0.009                                        | 0.221                                        | 0.010            | 0.000            | 0.001           | 0.012                    | 0.252                   | 65.377                                       | 0.378                   |                         |
| Q3 IQR              |                                      | 5.125            | 3.512            | 63.972          | 1.508            | 33.694          | 0.002                  | 0.035                  | 0.017                                        | 0.372                                        | 0.018            | 0.007            | 0.137           | 0.020                    | 5.941                   | 99.370                                       | 30.070                  |                         |
| 1                   | 3                                    | 5.50             | 4.00             | 72.72           | 0.88             | 16.03           | 0.00                   | 0.01                   | 0.02                                         | 0.30                                         | 0.017            | 0.00             | 0.03            | 0.018                    | 2.68                    | 88.77                                        | 8.55                    | 100.00                  |
| 2                   | 3                                    | 3.90             | 1.89             | 48.56           | 1.47             | 37.73           | 0.00                   | 0.00                   | 0.01                                         | 0.29                                         | 0.011            | 0.00             | 0.00            | 0.011                    | 0.13                    | 99.12                                        | 0.76                    | 100.00                  |
| 3                   | 3                                    | 8.40             | 6.74             | 80.24           | 0.98             | 11.66           | 0.00                   | 0.03                   | 0.02                                         | 0.21                                         | 0.020            | 0.01             | 0.10            | 0.028                    | 8.48                    | 63.41                                        | 28.11                   | 100.00                  |
| 4                   | 3                                    | 12.70            | 7.91             | 62.30           | 4.44             | 34.93           | 0.00                   | 0.02                   | 0.01                                         | 0.05                                         | 0.008            | 0.01             | 0.11            | 0.022                    | 10.10                   | 0.08                                         | 61.51                   | 100.00                  |
| 5                   | 3                                    | 4.90             | 2.17             | 44.31           | 2.29             | 46.81           | 0.00                   | 0.04                   | 0.01                                         | 0.30                                         | 0.017            | 0.00             | 0.07            | 0.020                    | 8.93                    | 74.84                                        | 16.23                   | 100.00                  |
| 6                   | 3                                    | 6.30             | 3.70             | 58.80           | 2.11             | 33.46           | 0.01                   | 0.13                   | 0.02                                         | 0.36                                         | 0.031            | 0.02             | 0.34            | 0.052                    | 15.43                   | 43.58                                        | 40.99                   | 100.00                  |
| 7                   | 3                                    | 7.50             | 5.64             | 75.24           | 1.40             | 18.61           | 0.00                   | 0.06                   | 0.01                                         | 0.10                                         | 0.012            | 0.01             | 0.11            | 0.020                    | 22.01                   | 37.32                                        | 40.67                   | 100.00                  |
| 8                   | 3                                    | 3.50             | 2.11             | 60.18           | 1.08             | 30.87           | 0.00                   | 0.04                   | 0.02                                         | 0.52                                         | 0.019            | 0.02             | 0.45            | 0.035                    | 3.79                    | 51.59                                        | 44.61                   | 100.00                  |
| Median              |                                      | 5.900            | 3.852            | 61.242          | 1.434            | 32.167          | 0.002                  | 0.032                  | 0.016                                        | 0.293                                        | 0.017            | 0.008            | 0.101           | 0.021                    | 8.709                   | 57.499                                       | 34.391                  |                         |
| Mean                |                                      | 6.588            | 4.271            | 62.795          | 1.831            | 28.765          | 0.003                  | 0.039                  | 0.014                                        | 0.266                                        | 0.017            | 0.009            | 0.149           | 0.026                    | 8.944                   | 60.877                                       | 30.179                  | 100.00                  |
| SD                  |                                      | 2.984            | 2.280            | 12.679          | 1.170            | 12.120          | 0.003                  | 0.040                  | 0.006                                        | 0.148                                        | 0.007            | 0.007            | 0.158           | 0.013                    | 7.150                   | 23.034                                       | 18.139                  |                         |
| Q1 IQR              |                                      | 4.650            | 2.155            | 56.242          | 1.055            | 17.969          | 0.001                  | 0.015                  | 0.010                                        | 0.186                                        | 0.012            | 0.003            | 0.056           | 0.019                    | 3.514                   | 42.014                                       | 14.309                  |                         |
| Q3 IQR              |                                      | 7.725            | 5.917            | 73.353          | 2.155            | 35.632          | 0.003                  | 0.043                  | 0.018                                        | 0.316                                        | 0.020            | 0.014            | 0.165           | 0.030                    | 5.941                   | 99.370                                       | 30.070                  |                         |
| 1                   | 4                                    | 9.00             | 5.16             | 57.37           | 3.16             | 35.15           | 0.03                   | 0.30                   | 0.03                                         | 0.34                                         | 0.057            | 0.05             | 0.58            | 0.110                    | 24.19                   | 27.97                                        | 47.83                   | 100.00                  |
| 2                   | 4                                    | 6.60             | 3.44             | 52.06           | 2.75             | 41.68           | 0.00                   | 0.02                   | 0.02                                         | 0.28                                         | 0.020            | 0.01             | 0.15            | 0.030                    | 3.41                    | 63.17                                        | 33.42                   | 100.00                  |
| 3                   | 4                                    | 13.00            | 11.08            | 85.24           | 1.31             | 10.09           | 0.02                   | 0.14                   | 0.03                                         | 0.24                                         | 0.050            | 0.02             | 0.13            | 0.066                    | 28.02                   | 47.35                                        | 24.63                   | 100.00                  |
| 4                   | 4                                    | 17.10            | 8.77             | 51.28           | 7.93             | 46.40           | 0.04                   | 0.21                   | 0.01                                         | 0.06                                         | 0.046            | 0.06             | 0.37            | 0.109                    | 32.84                   | 9.01                                         | 58.15                   | 100.00                  |
| 5                   | 4                                    | 7.30             | 1.97             | 26.95           | 4.90             | 67.14           | 0.02                   | 0.29                   | 0.02                                         | 0.29                                         | 0.042            | 0.02             | 0.21            | 0.058                    | 36.74                   | 36.74                                        | 26.52                   | 100.00                  |
| 6                   | 4                                    | 11.30            | 6.55             | 57.99           | 4.14             | 36.63           | 0.08                   | 0.67                   | 0.03                                         | 0.29                                         | 0.108            | 0.09             | 0.78            | 0.196                    | 38.47                   | 16.40                                        | 45.13                   | 100.00                  |
| 7                   | 4                                    | 12.60            | 9.46             | 75.09           | 2.67             | 21.17           | 0.03                   | 0.22                   | 0.01                                         | 0.06                                         | 0.036            | 0.04             | 0.32            | 0.076                    | 36.79                   | 9.91                                         | 53.29                   | 100.00                  |
| 8                   | 4                                    | 7.00             | 4.51             | 64.46           | 2.11             | 30.08           | 0.01                   | 0.12                   | 0.04                                         | 0.52                                         | 0.045            | 0.06             | 0.86            | 0.106                    | 8.14                    | 34.58                                        | 57.28                   | 100.00                  |
| Median              |                                      | 10.150           | 5.858            | 57.680          | 2.957            | 35.888          | 0.024                  | 0.217                  | 0.026                                        | 0.285                                        | 0.045            | 0.047            | 0.348           | 0.091                    | 30.430                  | 31.275                                       | 46.480                  |                         |
| Mean                |                                      | 10.488           | 6.368            | 58.807          | 3.622            | 36.041          | 0.027                  | 0.246                  | 0.024                                        | 0.260                                        | 0.050            | 0.043            | 0.427           | 0.094                    | 26.076                  | 30.642                                       | 43.282                  | 100.00                  |
| SD                  |                                      | 3.680            | 3.172            | 17.383          | 2.071            | 17.060          | 0.023                  | 0.194                  | 0.011                                        | 0.150                                        | 0.026            | 0.028            | 0.286           | 0.050                    | 13.473                  | 18.889                                       | 13.455                  |                         |
| Q1 IQR              |                                      | 7.225            | 4.243            | 51.869          | 2.527            | 27.853          | 0.016                  | 0.138                  | 0.017                                        | 0.196                                        | 0.041            | 0.016            | 0.195           | 0.064                    | 20.182                  | 14.782                                       | 31.695                  |                         |
| Q3 IQR              |                                      | 12.700           | 8.943            | 67.120          | 4.329            | 42.856          | 0.030                  | 0.292                  | 0.032                                        | 0.303                                        | 0.052            | 0.061            | 0.634           | 0.109                    | 36.752                  | 39.391                                       | 54.289                  |                         |
| 1                   | 6                                    | 10.90            | 7.71             | 70.74           | 2.31             | 21.23           | 0.18                   | 1.64                   | 0.04                                         | 0.40                                         | 0.223            | 0.19             | 1.70            | 0.409                    | 43.83                   | 10.76</                                      |                         |                         |

Healthy volunteers challenged with with 2 ng/kg of LPS  
Cytokines in blood

| CCL3, MIP1α (pg/ml)            |     |       |       |       |       |       |       |       |       |        |       |       |        |        |
|--------------------------------|-----|-------|-------|-------|-------|-------|-------|-------|-------|--------|-------|-------|--------|--------|
| Healthy volunteer #            |     | 1     | 2     | 3     | 4     | 5     | 6     | 7     | 8     | Median | Mean  | SD    | Q1 IQR | Q3 IQR |
| Hours post endotoxin challenge | 0   | 50.0  | 32.9  | 29.0  | 8.7   | 15.2  | 20.0  | 6.6   | 14.4  |        |       |       |        |        |
|                                | 0   | 52.2  | 27.1  | 17.0  | 4.8   | 13.6  | 18.9  | 5.1   | 10.0  | 16.1   | 20.3  | 14.6  | 9.7    | 27.6   |
|                                | 1   | 255.0 | 284.0 | 435.0 | 840.0 | 284.0 | 314.0 | 205.0 | 297.0 | 290.5  | 364.3 | 203.0 | 276.8  | 344.3  |
|                                | 2   | 556.0 | 501.0 | 647.0 | 704.0 | 409.0 | 274.0 | 248.0 | 348.0 | 455.0  | 460.9 | 169.1 | 329.5  | 578.8  |
|                                | 3   | 138.0 | 261.0 | 179.0 | 248.0 | 114.0 | 127.0 | 97.5  | 67.8  | 132.5  | 154.0 | 69.8  | 109.9  | 196.3  |
|                                | 4   | 82.6  | 86.6  | 136.0 | 187.0 | 72.9  | 64.4  | 46.0  | 45.6  | 77.8   | 90.1  | 48.5  | 59.8   | 98.9   |
|                                | 6   | 64.4  | 44.0  | 93.3  | 150.0 | 39.4  | 35.0  | 19.6  | 23.3  | 41.7   | 58.6  | 43.9  | 32.1   | 71.6   |
|                                | 8   | 62.6  | 39.2  | 48.0  | 91.6  | 23.8  | 27.4  | 10.7  | 24.3  | 33.3   | 41.0  | 26.1  | 24.2   | 51.7   |
|                                | 336 | 43.7  | 24.6  | 15.4  | 10.2  | 16.2  | 21.8  | 6.6   | 8.5   | 15.8   | 18.4  | 12.0  | 9.7    | 22.5   |

| CCL4, MIP-1β (pg/ml)           |     |        |        |        |         |        |        |        |        |        |        |        |        |        |
|--------------------------------|-----|--------|--------|--------|---------|--------|--------|--------|--------|--------|--------|--------|--------|--------|
| Healthy volunteer #            |     | 1      | 2      | 3      | 4       | 5      | 6      | 7      | 8      | Median | Mean   | SD     | Q1 IQR | Q3 IQR |
| Hours post endotoxin challenge | 0   | 31.0   | 31.0   | 31.0   | 31.1    | 31.1   | 31.1   | 31.1   | 31.1   |        |        |        |        |        |
|                                | 0   | 63.8   | 103.0  | 97.5   | 64.2    | 60.7   | 71.7   | 28.9   | 66.7   | 31.1   | 50.3   | 25.3   | 31.0   | 64.8   |
|                                | 1   | 63.8   | 78.6   | 64.6   | 59.6    | 54.5   | 59.2   | 19.2   | 39.7   | 59.4   | 54.9   | 18.1   | 50.8   | 64.0   |
|                                | 2   | 5057.0 | 4134.0 | 6820.0 | 10000.0 | 5579.0 | 2611.0 | 2580.0 | 6154.0 | 5318.0 | 5366.9 | 2426.6 | 3753.3 | 6320.5 |
|                                | 3   | 2561.0 | 3114.0 | 3434.0 | 6958.0  | 2001.0 | 1394.0 | 1632.0 | 1507.0 | 2281.0 | 2825.1 | 1832.0 | 1600.8 | 3194.0 |
|                                | 4   | 732.0  | 956.0  | 1073.0 | 3822.0  | 851.0  | 415.0  | 622.0  | 372.0  | 791.5  | 1105.4 | 1124.8 | 570.3  | 985.3  |
|                                | 6   | 663.0  | 230.0  | 724.0  | 2049.0  | 510.0  | 150.0  | 253.0  | 193.0  | 381.5  | 596.5  | 627.1  | 220.8  | 678.3  |
|                                | 8   | 453.0  | 197.0  | 467.0  | 1615.0  | 224.0  | 126.0  | 151.0  | 241.0  | 232.5  | 434.3  | 494.1  | 185.5  | 456.5  |
|                                | 336 | 57.8   | 67.7   | 61.3   | 53.3    | 60.2   | 81.3   | 28.9   | 41.5   | 59.0   | 56.5   | 15.9   | 50.3   | 62.9   |

| TNF (pg/ml)                    |     |        |        |        |        |        |        |        |        |        |        |        |        |        |
|--------------------------------|-----|--------|--------|--------|--------|--------|--------|--------|--------|--------|--------|--------|--------|--------|
| Healthy volunteer #            |     | 1      | 2      | 3      | 4      | 5      | 6      | 7      | 8      | Median | Mean   | SD     | Q1 IQR | Q3 IQR |
| Hours post endotoxin challenge | 0   | 26.0   | 38.0   | 48.0   | 26.0   | 21.0   | 35.0   | 11.0   | 29.0   |        |        |        |        |        |
|                                | 0   | 19.0   | 29.0   | 39.0   | 25.0   | 24.0   | 32.0   | 10.0   | 13.0   | 26.0   | 26.6   | 10.5   | 20.5   | 32.8   |
|                                | 1   | 2351.0 | 4191.0 | 3911.0 | 4136.0 | 2671.0 | 3166.0 | 1280.0 | 1665.0 | 2918.5 | 2921.4 | 1120.4 | 2179.5 | 3967.3 |
|                                | 2   | 1868.0 | 4324.0 | 3771.0 | 3074.0 | 1849.0 | 1585.0 | 1171.0 | 1372.0 | 1858.5 | 2376.8 | 1186.2 | 1531.8 | 3248.3 |
|                                | 3   | 768.0  | 1445.0 | 1580.0 | 1111.0 | 561.0  | 786.0  | 518.0  | 408.0  | 777.0  | 897.1  | 437.1  | 550.3  | 1194.5 |
|                                | 4   | 400.0  | 836.0  | 747.0  | 611.0  | 432.0  | 416.0  | 322.0  | 199.0  | 424.0  | 495.4  | 217.1  | 380.5  | 645.0  |
|                                | 6   | 141.0  | 388.0  | 384.0  | 333.0  | 223.0  | 244.0  | 97.0   | 132.0  | 233.5  | 242.8  | 115.5  | 138.8  | 345.8  |
|                                | 8   | 124.0  | 271.0  | 311.0  | 224.0  | 141.0  | 168.0  | 54.0   | 105.0  | 154.5  | 174.8  | 87.4   | 119.3  | 235.8  |
|                                | 336 | 17.0   | 23.0   | 33.0   | 23.0   | 23.0   | 39.0   | 10.0   | 14.0   | 23.0   | 22.8   | 9.6    | 16.3   | 25.5   |

| IL-1-RA (pg/ml)                |     |         |         |         |         |         |         |         |        |         |        |        |        |         |
|--------------------------------|-----|---------|---------|---------|---------|---------|---------|---------|--------|---------|--------|--------|--------|---------|
| Healthy volunteer #            |     | 1       | 2       | 3       | 4       | 5       | 6       | 7       | 8      | Median  | Mean   | SD     | Q1 IQR | Q3 IQR  |
| Hours post endotoxin challenge | 0   | 29.0    | 79.0    | 118.0   | 53.0    | 81.0    | 50.0    | 75.0    | 62.0   |         |        |        |        |         |
|                                | 0   | 11.0    | 29.0    | 55.0    | 36.0    | 74.0    | 30.0    | 69.0    | 6.0    | 54.0    | 53.6   | 29.3   | 29.8   | 74.3    |
|                                | 1   | 31.0    | 75.0    | 118.0   | 96.0    | 117.0   | 71.0    | 77.0    | 45.0   | 76.0    | 78.8   | 31.2   | 64.5   | 101.3   |
|                                | 2   | 950.0   | 2532.0  | 3438.0  | 5821.0  | 1547.0  | 3141.0  | 1546.0  | 2270.0 | 2401.0  | 2655.6 | 1530.7 | 1546.8 | 3215.3  |
|                                | 3   | 10000.0 | 10000.0 | 10000.0 | 10000.0 | 9793.0  | 10000.0 | 9872.0  | 9109.0 | 10000.0 | 9846.8 | 308.3  | 9852.3 | 10000.0 |
|                                | 4   | 10000.0 | 10000.0 | 9331.0  | 10000.0 | 10000.0 | 10000.0 | 10000.0 | 6785.0 | 10000.0 | 9514.5 | 1127.5 | 9832.8 | 10000.0 |
|                                | 6   | 4595.0  | 5827.0  | 5001.0  | 7589.0  | 4300.0  | 6525.0  | 3229.0  | 2685.0 | 4798.0  | 4968.9 | 1641.2 | 4032.3 | 6001.5  |
|                                | 8   | 2199.0  | 3647.0  | 3499.0  | 6028.0  | 1846.0  | 2875.0  | 1799.0  | 1930.0 | 2537.0  | 2977.9 | 1434.7 | 1909.0 | 3536.0  |
|                                | 336 | 16.0    | 25.0    | 34.0    | 40.0    | 79.0    | 65.0    | 71.0    | 16.0   | 37.0    | 43.3   | 25.2   | 22.8   | 66.5    |

| IL-6 (pg/ml)                   |     |        |       |        |        |        |       |       |        |        |        |       |        |        |
|--------------------------------|-----|--------|-------|--------|--------|--------|-------|-------|--------|--------|--------|-------|--------|--------|
| Healthy volunteer #            |     | 1      | 2     | 3      | 4      | 5      | 6     | 7     | 8      | Median | Mean   | SD    | Q1 IQR | Q3 IQR |
| Hours post endotoxin challenge | 0   | 35.0   | 3.2   | 43.8   | 3.2    | 29.4   | 10.5  | 23.0  | 12.1   |        |        |       |        |        |
|                                | 0   | 41.2   | 3.2   | 11.4   | 3.2    | 25.8   | 8.7   | 19.3  | 6.2    | 11.8   | 17.5   | 14.0  | 5.5    | 26.7   |
|                                | 1   | 67.6   | 40.2  | 78.1   | 130.0  | 76.7   | 94.5  | 45.7  | 138.0  | 77.4   | 83.9   | 35.6  | 62.1   | 103.4  |
|                                | 2   | 1261.0 | 761.0 | 1758.0 | 1770.0 | 1048.0 | 824.0 | 863.0 | 1636.0 | 1154.5 | 1240.1 | 428.9 | 853.3  | 1666.5 |
|                                | 3   | 585.0  | 889.0 | 1578.0 | 1359.0 | 412.0  | 609.0 | 744.0 | 1228.0 | 816.5  | 925.5  | 417.3 | 603.0  | 1260.8 |
|                                | 4   | 118.0  | 590.0 | 718.0  | 378.0  | 177.0  | 133.0 | 285.0 | 340.0  | 312.5  | 342.4  | 216.6 | 166.0  | 431.0  |
|                                | 6   | 29.7   | 27.3  | 46.1   | 21.0   | 39.8   | 21.8  | 30.5  | 41.0   | 30.1   | 32.2   | 9.2   | 25.9   | 40.1   |
|                                | 8   | 35.6   | 4.5   | 22.4   | 6.3    | 34.2   | 12.2  | 21.6  | 18.5   | 20.1   | 19.4   | 11.6  | 10.7   | 25.4   |
|                                | 336 | 27.3   | 3.2   | 8.4    | 3.2    | 26.9   | 14.3  | 18.8  | 5.8    | 11.4   | 13.5   | 10.0  | 5.2    | 20.8   |

| IL-8 (pg/ml)                   |     |       |        |       |       |       |       |       |       |        |       |       |        |        |
|--------------------------------|-----|-------|--------|-------|-------|-------|-------|-------|-------|--------|-------|-------|--------|--------|
| Healthy volunteer #            |     | 1     | 2      | 3     | 4     | 5     | 6     | 7     | 8     | Median | Mean  | SD    | Q1 IQR | Q3 IQR |
| Hours post endotoxin challenge | 0   | 20.0  | 15.0   | 12.0  | 6.0   | 11.0  | 10.0  | 9.0   | 14.0  |        |       |       |        |        |
|                                | 0   | 25.0  | 13.0   | 5.0   | 3.0   | 12.0  | 8.0   | 8.0   | 9.0   | 10.5   | 11.3  | 5.5   | 8.0    | 13.3   |
|                                | 1   | 34.0  | 42.0   | 25.0  | 24.0  | 35.0  | 41.0  | 24.0  | 37.0  | 34.5   | 32.8  | 7.5   | 24.8   | 38.0   |
|                                | 2   | 784.0 | 1400.0 | 526.0 | 566.0 | 678.0 | 742.0 | 618.0 | 742.0 | 710.0  | 757.0 | 275.2 | 605.0  | 752.5  |
|                                | 3   | 567.0 | 1966.0 | 501.0 | 402.0 | 347.0 | 622.0 | 543.0 | 578.0 | 555.0  | 690.8 | 523.5 | 476.3  | 589.0  |
|                                | 4   | 186.0 | 548.0  | 175.0 | 184.0 | 187.0 | 204.0 | 219.0 | 227.0 | 195.5  | 241.3 | 125.3 | 185.5  | 221.0  |
|                                | 6   | 103.0 | 156.0  | 94.0  | 121.0 | 81.0  | 115.0 | 103.0 | 132.0 | 109.0  | 113.1 | 23.5  | 100.8  | 123.8  |
|                                | 8   | 100.0 | 115.0  | 64.0  | 85.0  | 56.0  | 77.0  | 57.0  | 110.0 | 81.0   | 83.0  | 23.4  | 62.3   | 102.5  |
|                                | 336 | 17.0  | 9.0    | 4.0   | 3.0   | 12.0  | 11.0  | 7.0   | 9.0   | 9.0    | 9.0   | 4.5   | 6.3    | 11.3   |

| CCL2, MCP-1 (pg/ml)            |     |        |        |        |        |        |        |        |        |        |        |        |        |        |
|--------------------------------|-----|--------|--------|--------|--------|--------|--------|--------|--------|--------|--------|--------|--------|--------|
| Healthy volunteer #            |     | 1      | 2      | 3      | 4      | 5      | 6      | 7      | 8      | Median | Mean   | SD     | Q1 IQR | Q3 IQR |
| Hours post endotoxin challenge | 0   | 533.0  | 489.0  | 213.0  | 413.0  | 324.0  | 306.0  | 228.0  | 456.0  |        |        |        |        |        |
|                                | 0   | 363.0  | 369.0  | 236.0  | 339.0  | 260.0  | 281.0  | 187.0  | 248.0  | 315.0  | 327.8  | 103.2  | 245.0  | 380.0  |
|                                | 1   | 488.0  | 808.0  | 672.0  | 1016.0 | 663.0  | 707.0  | 428.0  | 575.0  | 667.5  | 669.6  | 185.5  | 553.3  | 732.3  |
|                                | 2   | 4544.0 | 4282.0 | 5745.0 | 4018.0 | 3049.0 | 2999.0 | 1342.0 | 5937.0 | 4150.0 | 3989.5 | 1518.6 | 3036.5 | 4844.3 |
|                                | 3   | 5065.0 | 4805.0 | 5973.0 | 4530.0 | 2548.0 | 4838.0 | 1351.0 | 8346.0 | 4821.5 | 4682.0 | 2102.7 | 4034.5 | 5292.0 |
|                                | 4   | 4430.0 | 4870.0 | 5961.0 | 4099.0 | 4008.0 | 3131.0 | 1773.0 | 7933.0 | 4264.5 | 4525.6 | 1842.8 | 3788.8 | 5142.8 |
|                                | 6   | 1969.0 | 3667.0 | 5089.0 | 4208.0 | 4394.0 | 3662.0 | 1364.0 | 4275.0 | 3937.5 | 3578.5 | 1272.6 | 3238.8 | 4304.8 |
|                                | 8   | 779.0  | 3189.0 | 1311.0 | 1566.0 | 983.0  | 1276.0 | 553.0  | 1815.0 | 1293.5 | 1434.0 | 818.6  | 932.0  | 1628.3 |
|                                | 336 | 550.0  | 365.0  | 263.0  | 375.0  | 336.0  | 277.0  | 175.0  | 357.0  | 346.5  | 337.3  | 109.1  | 273.5  | 367.5  |

| IL-10 (pg/ml)                  |     |       |       |       |       |       |        |       |        |        |       |       |        |        |
|--------------------------------|-----|-------|-------|-------|-------|-------|--------|-------|--------|--------|-------|-------|--------|--------|
| Healthy volunteer #            |     | 1     | 2     | 3     | 4     | 5     | 6      | 7     | 8      | Median | Mean  | SD    | Q1 IQR | Q3 IQR |
| Hours post endotoxin challenge | 0   | 4.0   | 12.0  | 35.0  | 10.0  | 3.0   | 10.0   | 3.0   | 10.0   |        |       |       |        |        |
|                                | 0   | 3.0   | 5.0   | 10.0  | 4.0   | 3.0   | 7.0    | 3.0   | 3.0    | 4.5    | 7.8   | 8.0   | 3.0    | 10.0   |
|                                | 1   | 59.0  | 177.0 | 136.0 | 153.0 | 165.0 | 146.0  | 33.0  | 105.0  | 141.0  | 121.8 | 51.8  | 93.5   | 156.0  |
|                                | 2   | 458.0 | 407.0 | 485.0 | 660.0 | 395.0 | 802.0  | 158.0 | 572.0  | 471.5  | 492.1 | 192.8 | 404.0  | 594.0  |
|                                | 3   | 684.0 | 623.0 | 959.0 | 597.0 | 340.0 | 1134.0 | 216.0 | 1162.0 | 653.5  | 714.4 | 348.0 | 532.8  | 1002.8 |
|                                | 4   | 175.0 | 170.0 | 379.0 | 130.0 | 94.0  | 256.0  | 71.0  | 305.0  | 172.5  | 197.5 | 107.2 | 121.0  | 268.3  |
|                                | 6   | 55.0  | 92.0  | 138.0 | 69.0  | 74.0  | 85.0   | 13.0  | 37.0   | 71.5   | 70.4  | 37.6  | 50.5   | 86.8   |
|                                | 8   | 29.0  | 43.0  | 53.0  | 54.0  | 26.0  | 57.0   | 10.0  | 19.0   | 36.0   | 36.4  | 17.8  | 24.3   | 53.3   |
| 336                            | 3.0 | 5.0   | 6.0   | 6.0   | 3.0   | 11.0  | 3.0    | 3.0   | 4.0    | 5.0    | 2.8   | 3.0   | 6.0    |        |



Uninfected mechanically ventilated ICU patients  
Characteristics and cell counts in blood at ICU admission and ICU discharge

| Patient code |    | Age   | Gender | Reason of admission       | ICU stay | Mechanical ventilation | APACHE II score | SOFA score | CRP   | PCT   | Lactate | HAI    | Days till infection | VAP    | Non-VAP HAI              | Pathogen                          | Survivor | Days till death |
|--------------|----|-------|--------|---------------------------|----------|------------------------|-----------------|------------|-------|-------|---------|--------|---------------------|--------|--------------------------|-----------------------------------|----------|-----------------|
|              |    | Years | M/F    |                           | Days     | Yes/No                 |                 |            | mg/mL | ng/mL | mmol/L  | Yes/No |                     | Yes/No | Yes/No (origin)          |                                   | Yes/No   |                 |
| 1            | 1  | 87    | F      | Non septic shock          | 6        | Yes                    | 27              | 15         | 125   | 1.78  | 0.94    | Yes    | 2                   | Yes    | No                       | Citrobacter freundii              | Yes      |                 |
| 2            | 2  | 66    | M      | Non septic shock          | 21       | Yes                    | 24              | 21         | 323   | 51    | 3       | Yes    | 1                   | Yes    | No                       | Citrobacter freundii              | Yes      |                 |
| 3            | 3  | 71    | M      | Neurological failure      | 17       | Yes                    | 22              | 10         | 249   | NA    | 1.06    | Yes    | 2                   | No     | Yes (unknown)            | Gram (-) bacillus, enterobacteria | Yes      |                 |
| 4            | 4  | 47    | F      | Neurological failure      | 20       | Yes                    | 19              | 10         | 168   | NA    | 0.7     | Yes    | 0                   | Yes    | No                       | Haemophilus influenzae            | Yes      |                 |
| 5            | 6  | 68    | M      | Non septic shock          | 9        | Yes                    | 23              | 10         | 69    | 15.7  | 3.4     | Yes    | 0                   | No     | Yes (primary bacteremia) | Enterococcus faecalis             | Yes      |                 |
| 6            | 7  | 71    | M      | Neurological failure      | 6        | Yes                    | 22              | 15         | NA    | NA    | NA      | No     |                     | No     | No                       |                                   | No       | 6               |
| 7            | 8  | 63    | M      | Acute respiratory failure | 7        | Yes                    | 25              | 9          | 23    | 50.3  | 2.6     | Yes    | 0                   | Yes    | No                       | Aeromonas spp                     | Yes      |                 |
| 8            | 9  | 48    | F      | Neurological failure      | 8        | Yes                    | 17              | 14         | 76    | NA    | 0.6     | Yes    | 3                   | Yes    | No                       | Streptococcus aureus              | Yes      |                 |
| 9            | 10 | 51    | M      | Neurological failure      | 6        | Yes                    | 13              | 14         | NA    | NA    | NA      | No     |                     | No     | No                       |                                   | Yes      |                 |
| 10           | 11 | 65    | F      | Neurological failure      | 11       | Yes                    | 16              | 8          | 185   | 0.2   | 1.3     | Yes    | 1                   | Yes    | No                       | Klebsiella pneumoniae             | Yes      |                 |
| 11           | 13 | 52    | M      | Non septic shock          | 19       | Yes                    | 16              | 15         | 322   | 3.93  | 1.2     | Yes    | 1                   | No     | Yes (primary bacteremia) | Enterobacter aerogenes            | Yes      |                 |
| 12           | 15 | 68    | F      | Neurological failure      | 8        | Yes                    | 23              | 11         | NA    | NA    | NA      | No     |                     | No     | No                       |                                   | Yes      |                 |
| 13           | 16 | 51    | F      | Neurological failure      | 11       | Yes                    | 16              | 11         | NA    | 0.06  | 0.6     | Yes    | 2                   | No     | Yes (unknown)            | Unknown                           | Yes      |                 |
| 14           | 18 | 81    | F      | Non septic shock          | 14       | Yes                    | 21              | 10         | 338   | 3.6   | 0.8     | Yes    | 3                   | No     | Yes (unknown)            | S. epidermidis & C. albicans      | Yes      |                 |
| 15           | 19 | 63    | F      | Neurological failure      | 2        | Yes                    | 21              | 6          | NA    | NA    | NA      | No     |                     | No     | No                       |                                   | Yes      |                 |
| 16           | 20 | 32    | M      | Multiorgan failure        | 4        | Yes                    | 19              | 17         | NA    | NA    | NA      | No     |                     | No     | No                       |                                   | No       | 4               |
| 17           | 21 | 85    | F      | Neurological failure      | 6        | Yes                    | 20              | 14         | NA    | NA    | NA      | No     |                     | No     | No                       |                                   | Yes      |                 |
| 18           | 25 | 67    | M      | Non septic shock          | 19       | Yes                    | 23              | 15         | 122   | 0.86  | 1.8     | Yes    | 0                   | No     | Yes (unknown)            | Haemophilus influenzae            | Yes      |                 |
| 19           | 26 | 84    | M      | Non septic shock          | 6        | Yes                    | 12              | 13         | 162   | NA    | 1.09    | Yes    | 2                   | Yes    | No                       | Serratia marcescens               | Yes      |                 |
| 20           | 27 | 65    | M      | Other                     | 11       | Yes                    | 20              | 14         | 155   | NA    | 1.7     | Yes    | 0                   | Yes    | No                       | Unknown                           | Yes      |                 |
| 21           | 28 | 62    | M      | Non septic shock          | 22       | Yes                    | 11              | 10         | 171   | 0.42  | 1.1     | Yes    | 8                   | Yes    | No                       | Haemophilus influenzae            | Yes      |                 |
| 22           | 29 | 47    | M      | Neurological failure      | 5        | Yes                    | 18              | 14         | 211   | 0.19  | 0.9     | Yes    | 0                   | No     | Yes (unknown)            | Haemophilus influenzae            | Yes      |                 |
| 23           | 30 | 69    | M      | Non septic shock          | 8        | Yes                    | 22              | 13         | 110   | 1.73  | 3.6     | Yes    | 0                   | Yes    | No                       | Haemophilus influenzae            | Yes      |                 |
| 24           | 32 | 66    | F      | Neurological failure      | 13       | Yes                    | 23              | 7          | 103   | NA    | 0.8     | Yes    | 4                   | No     | Yes (unknown)            | Proteus mirabilis                 | No       | 13              |
| 25           | 33 | 60    | M      | Neurological failure      | 8        | Yes                    | 17              | 8          | 86    | NA    | 0.6     | Yes    | 6                   | Yes    | No                       | Haemophilus in                    | No       | 8               |
| 26           | 34 | 65    | M      | Non septic shock          | 6        | Yes                    | 25              | 17         | 121   | NA    | 2.4     | Yes    | 1                   | No     | Yes (urinary)            | Enterococcus faecalis             | Yes      |                 |
| 27           | 36 | 36    | F      | Acute respiratory failure | 4        | Yes                    | 18              | 16         | 123   | NA    | 1.1     | Yes    | 0                   | Yes    | No                       | Haemophilus influenzae            | Yes      |                 |
| 28           | 37 | 61    | F      | Neurological failure      | 16       | Yes                    | 18              | 10         | 281   | NA    | 1.1     | Yes    | 0                   | Yes    | No                       | Klebsiella aerogenes              | Yes      |                 |
| 29           | 38 | 52    | F      | Non septic shock          | 4        | Yes                    | 15              | 11         | NA    | NA    | 0.8     | Yes    | 0                   | No     | Yes (unknown)            | Unknown                           | Yes      |                 |
| 30           | 39 | 50    | F      | Neurological failure      | 4        | Yes                    | 14              | 5          | NA    | NA    | NA      | No     |                     | No     | No                       |                                   | Yes      |                 |
| 31           | 42 | 66    | M      | Non septic shock          | 9        | Yes                    | 7               | 6          | 302   | NA    | 1.1     | Yes    | 5                   | Yes    | No                       | Haemophilus influenzae            | Yes      |                 |
| 32           | 43 | 52    | M      | Other                     | 20       | Yes                    | 18              | 12         | 358   | 1.35  | 0.9     | Yes    | 0                   | Yes    | No                       | Klebsiella pneumoniae             | Yes      |                 |
| 33           | 44 | 78    | F      | Non septic shock          | 8        | Yes                    | 26              | 15         | NA    | NA    | NA      | No     |                     | No     | No                       |                                   | Yes      |                 |
| Median       |    | 65.0  |        |                           | 8.0      |                        | 19.0            | 12.0       | 162.0 | 1.7   | 1.1     |        | 1.0                 |        |                          |                                   |          | 7.0             |
| Mean         |    | 62.2  |        |                           | 10.2     |                        | 19.1            | 12.0       | 181.0 | 9.5   | 1.4     |        | 1.6                 |        |                          |                                   |          | 7.6             |
| SD           |    | 13.2  |        |                           | 5.9      |                        | 4.6             | 3.7        | 97.6  | 18.5  | 0.9     |        | 2.2                 |        |                          |                                   |          | 3.5             |
| Q1 IQR       |    | 52.0  |        |                           | 6.0      |                        | 16.0            | 10.0       | 115.5 | 0.4   | 0.8     |        | 0.0                 |        |                          |                                   |          | 5.5             |
| Q3 IQR       |    | 68.0  |        |                           | 14.0     |                        | 23.0            | 15.0       | 265.0 | 3.9   | 1.7     |        | 2.0                 |        |                          |                                   |          | 9.3             |

| At ICU admission |    | Leukocytes       | Neutrophils      | Neutrophils     | Lin+ cells & DCs | Lin+ cells & DCs | PMN-MDSCs        | PMN-MDSCs       | Classical monocytes | Classical monocytes | Intermediate & NC monocytes | Intermediate & NC monocytes | M-MDSCs          | M-MDSCs         | CD15 <sup>low</sup> M-MDSCs | CD15 <sup>low</sup> M-MDSCs | CD15 <sup>int</sup> M-MDSCs | CD15 <sup>int</sup> M-MDSCs |
|------------------|----|------------------|------------------|-----------------|------------------|------------------|------------------|-----------------|---------------------|---------------------|-----------------------------|-----------------------------|------------------|-----------------|-----------------------------|-----------------------------|-----------------------------|-----------------------------|
| Patient code     |    | Million cells/mL | Million cells/mL | % of leukocytes | Million cells/mL | % of leukocytes  | Million cells/mL | % of leukocytes | Million cells/mL    | % of leukocytes     | Million cells/mL            | % of leukocytes             | Million cells/mL | % of leukocytes | Million cells/mL            | % of leukocytes             | Million cells/mL            | % of leukocytes             |
| 1                | 1  | x                | x                | x               | x                | x                | x                | x               | x                   | x                   | x                           | x                           | x                | x               | x                           | x                           | x                           | x                           |
| 2                | 2  | 9.67             | 8.80             | 91.03           | 0.25             | 2.58             | 0.05             | 0.54            | 0.12                | 1.25                | 0.07                        | 0.69                        | 0.37             | 3.79            | 0.32                        | 3.32                        | 0.05                        | 0.47                        |
| 3                | 3  | 6.77             | 5.49             | 81.10           | 0.32             | 4.71             | 0.23             | 3.43            | 0.34                | 4.99                | 0.03                        | 0.38                        | 0.32             | 4.78            | 0.09                        | 1.26                        | 0.24                        | 3.52                        |
| 4                | 4  | 5.59             | 4.20             | 75.17           | 0.76             | 13.56            | 0.18             | 3.25            | 0.28                | 4.95                | 0.02                        | 0.33                        | 0.03             | 0.56            | 0.01                        | 0.12                        | 0.02                        | 0.44                        |
| 5                | 6  | 16.50            | 15.55            | 94.22           | 0.51             | 3.07             | 0.03             | 0.17            | 0.29                | 1.77                | 0.01                        | 0.03                        | 0.12             | 0.70            | 0.09                        | 0.57                        | 0.02                        | 0.13                        |
| 6                | 7  | 4.86             | 3.20             | 65.93           | 0.51             | 10.59            | 0.50             | 10.23           | 0.34                | 7.09                | 0.10                        | 2.07                        | 0.19             | 3.83            | 0.07                        | 1.52                        | 0.11                        | 2.31                        |
| 7                | 8  | 11.36            | 7.24             | 63.73           | 0.31             | 2.76             | 3.07             | 27.06           | 0.51                | 4.52                | 0.03                        | 0.30                        | 0.17             | 1.47            | 0.03                        | 0.24                        | 0.14                        | 1.23                        |
| 8                | 9  | 1.39             | 0.86             | 61.75           | 0.31             | 22.55            | 0.03             | 2.17            | 0.14                | 10.00               | 0.01                        | 0.65                        | 0.03             | 2.47            | 0.01                        | 0.52                        | 0.03                        | 1.95                        |
| 9                | 10 | 5.31             | 0.60             | 11.25           | 1.12             | 21.11            | 3.30             | 62.18           | 0.18                | 3.36                | 0.04                        | 0.70                        | 0.05             | 0.87            | 0.00                        | 0.01                        | 0.05                        | 0.86                        |
| 10               | 11 | 8.16             | 6.34             | 77.67           | 1.05             | 12.92            | 0.01             | 0.15            | 0.59                | 7.28                | 0.04                        | 0.44                        | 0.05             | 0.61            | 0.02                        | 0.30                        | 0.03                        | 0.31                        |
| 11               | 13 | 12.19            | 11.09            | 91.00           | 0.47             | 3.84             | 0.04             | 0.30            | 0.39                | 3.20                | 0.04                        | 0.36                        | 0.14             | 1.13            | 0.11                        | 0.93                        | 0.02                        | 0.20                        |
| 12               | 15 | 7.37             | 6.41             | 86.91           | 0.46             | 6.18             | 0.04             | 0.54            | 0.11                | 1.55                | 0.02                        | 0.32                        | 0.27             | 3.69            | 0.22                        | 2.97                        | 0.05                        | 0.71                        |
| 13               | 16 | 5.69             | 4.20             | 73.76           | 0.88             | 15.53            | 0.01             | 0.20            | 0.27                | 4.68                | 0.02                        | 0.31                        | 0.08             | 1.47            | 0.06                        | 1.00                        | 0.03                        | 0.47                        |
| 14               | 18 | 11.14            | 9.47             | 84.99           | 0.73             | 6.59             | 0.06             | 0.56            | 0.39                | 3.49                | 0.17                        | 1.48                        | 0.09             | 0.78            | 0.00                        | 0.04                        | 0.08                        | 0.74                        |
| 15               | 19 | 7.12             | 4.87             | 68.41           | 1.45             | 20.29            | 0.02             | 0.30            | 0.68                | 9.58                | 0.07                        | 0.92                        | 0.03             | 0.42            | 0.01                        | 0.07                        | 0.03                        | 0.35                        |
| 16               | 20 | 4.22             | 1.70             | 40.26           | 0.70             | 16.46            | 1.54             | 36.45           | 0.13                | 3.17                | 0.02                        | 0.50                        | 0.10             | 2.43            | 0.02                        | 0.56                        | 0.08                        | 1.87                        |
| 17               | 21 | 9.43             | 6.98             | 74.02           | 1.64             | 17.34            | 0.25             | 2.62            | 0.40                | 4.28                | 0.03                        | 0.36                        | 0.11             | 1.13            | 0.05                        | 0.52                        | 0.06                        | 0.61                        |
| 18               | 25 | 4.20             | 0.27             | 6.55            | 0.34             | 8.22             | 2.77             | 66.08           | 0.20                | 4.80                | 0.06                        | 1.46                        | 0.53             | 12.57           | 0.09                        | 2.14                        | 0.44                        | 10.44                       |
| 19               | 26 | 9.08             | 6.42             | 70.74           | 0.24             | 2.66             | 0.24             | 2.67            | 1.08                | 11.90               | 0.02                        | 0.22                        | 1.05             | 11.58           | 1.00                        | 11.04                       | 0.05                        | 0.54                        |
| 20               | 27 | 5.65             | 1.98             | 35.10           | 0.37             | 6.59             | 2.93             | 51.77           | 0.06                | 1.06                | 0.11                        | 1.92                        | 0.20             | 3.46            | 0.02                        | 0.44                        | 0.17                        | 3.02                        |
| 21               | 28 | 8.82             | 1.72             | 19.53           | 1.66             | 18.87            | 4.65             | 52.75           | 0.56                | 6.41                | 0.03                        | 0.34                        | 0.14             | 1.62            | 0.03                        | 0.29                        | 0.12                        | 1.33                        |
| 22               | 29 | 8.68             | 5.09             | 58.59           | 0.99             | 11.40            | 1.85             | 21.26           | 0.58                | 6.68                | 0.06                        | 0.68                        | 0.04             | 0.41            | 0.00                        | 0.02                        | 0.03                        | 0.39                        |
| 23               | 30 | 9.52             | 3.09             | 32.44           | 0.38             | 4.02             | 5.19             | 54.47           | 0.30                | 3.13                | 0.10                        | 1.02                        | 0.46             | 4.80            | 0.27                        | 2.85                        | 0.19                        | 1.94                        |
| 24               | 32 | 7.58             | 1.85             | 24.44           | 1.70             | 22.40            | 3.05             | 40.20           | 0.28                | 3.70                | 0.06                        | 0.75                        | 0.29             | 3.88            | 0.08                        | 1.08                        | 0.21                        | 2.80                        |
| 25               | 33 | 7.19             | 4.91             | 68.29           | 0.64             | 8.91             | 0.82             | 11.37           | 0.54                | 7.50                | 0.04                        | 0.60                        | 0.19             | 2.65            | 0.07                        | 0.95                        | 0.12                        | 1.70                        |
| 26               | 34 | 5.03             | 3.37             | 66.89           | 0.98             | 19.45            | 0.09             | 1.73            | 0.43                | 8.56                | 0.07                        | 1.36                        | 0.06             | 1.23            | 0.00                        | 0.02                        | 0.06                        | 1.21                        |
| 27               | 36 | 6.22             | 3.73             | 60.01           | 1.00             | 16.09            | 1.20             | 19.37           | 0.16                | 2.58                | 0.03                        | 0.50                        | 0.07             | 1.21            | 0.03                        | 0.53                        | 0.04                        | 0.67                        |
| 28               | 37 | 10.53            | 7.70             | 73.13           | 1.61             | 15.27            | 0.28             | 2.69            | 0.48                | 4.57                | 0.05                        | 0.49                        | 0.24             | 2.23            | 0.13                        | 1.28                        | 0.10                        | 0.96                        |
| 29               | 38 | 8.83             | 7.47             | 84.62           | 0.48             | 5.44             | 0.16             | 1.81            | 0.57                | 6.49                | 0.02                        | 0.27                        | 0.09             | 0.97            | 0.01                        | 0.14                        | 0.07                        | 0.82                        |
| 30               | 39 | 4.97             | 3.75             | 75.56           | 0.80             | 16.02            | 0.08             | 1.71            | 0.23                | 4.68                | 0.06                        | 1.18                        | 0.02             | 0.39            | 0.00                        | 0.03                        | 0.02                        | 0.36                        |
| 31               | 42 | 10.11            | 7.97             | 78.77           | 1.01             | 10.02            | 0.02             | 0.16            | 0.72                | 7.16                | 0.15                        | 1.48                        | 0.18             | 1.75            | 0.04                        | 0.40                        | 0.14                        | 1.36                        |
| 32               | 43 | 5.01             | 3.90             | 77.93           | 0.55             | 11.03            | 0.13             | 2.68            | 0.16                | 3.12                | 0.05                        | 1.04                        | 0.19             | 3.83            | 0.14                        | 2.75                        | 0.05                        | 1.08                        |
| 33               | 44 | 11.94            | 11.18            | 93.66           | 0.06             | 0.48             | 0.29             | 2.46            | 0.23                | 1.90                | 0.06                        | 0.52                        | 0.11             | 0.89            | 0.02                        | 0.15                        | 0.09                        | 0.75                        |
| Median           |    | 7.48             | 4.89             | 71.94           | 0.67             | 10.81            | 0.24             | 2.68            | 0.32                | 4.63                | 0.04                        | 0.56                        | 0.13             | 1.54            | 0.04                        | 0.53                        | 0.06                        | 0.84                        |
| Mean             |    | 7.81             | 5.34             | 64.83           | 0.76             | 11.14            | 1.01             | 14.73           | 0.37                | 4.97                | 0.05                        | 0.73                        | 0.19             | 2.58            | 0.09                        | 1.17                        | 0.09                        | 1.41                        |
| SD               |    | 3.04             | 3.45             | 24.25           | 0.46             | 6.68             | 1.49             | 21.38           | 0.22                | 2.68                | 0.04                        | 0.51                        | 0.20             | 2.83            | 0.18                        | 2.03                        | 0.09                        | 1.86                        |
| Q1 IQR           |    | 5.52             | 3.17             | 59.66           | 0.38             | 5.26             | 0.05             | 0.56            | 0.20                | 3.16                | 0.03                        | 0.35                        | 0.07             | 0.89            | 0.01                        | 0.15                        | 0.03                        | 0.47                        |
| Q3 IQR           |    | 9.56             | 7.30             | 79.35           | 1.00             | 16.18            | 1.62             | 22.71           | 0.52                | 6.78                | 0.06                        | 1.02                        | 0.21             | 3.71            | 0.09                        | 1.26                        | 0.12                        | 1.74                        |

| At ICU discharge |    | Leukocytes       | Neutrophils      | Neutrophils     | Lin+ cells & DCs | Lin+ cells & DCs | PMN-MDSCs        | PMN-MDSCs       | Classical monocytes | Classical monocytes | Intermediate & NC monocytes | Intermediate & NC monocytes | M-MDSCs          | M-MDSCs         | CD15 <sup>low</sup> M-MDSCs | CD15 <sup>low</sup> M-MDSCs | CD15 <sup>int</sup> M-MDSCs | CD15 <sup>int</sup> M-MDSCs |
|------------------|----|------------------|------------------|-----------------|------------------|------------------|------------------|-----------------|---------------------|---------------------|-----------------------------|-----------------------------|------------------|-----------------|-----------------------------|-----------------------------|-----------------------------|-----------------------------|
| Patient code     |    | Million cells/mL | Million cells/mL | % of leukocytes | Million cells/mL | % of leukocytes  | Million cells/mL | % of leukocytes | Million cells/mL    | % of leukocytes     | Million cells/mL            | % of leukocytes             | Million cells/mL | % of leukocytes | Million cells/mL            | % of leukocytes             | Million cells/mL            | % of leukocytes             |
| 1                | 1  | 3.44             | 2.55             | 74.23           | 0.41             | 11.95            | 0.00             | 0.11            | 0.26                | 7.66                | 0.05                        | 1.34                        | 0.04             | 1.30            | 0.03                        | 0.79                        | 0.02                        | 0.52                        |
| 2                | 2  | 4.35             | 2.43             | 56.01           | 0.61             | 14.05            | 0.12             | 2.71            | 0.40                | 9.16                | 0.03                        | 0.79                        | 0.08             | 1.90            | 0.02                        | 0.43                        | 0.06                        | 1.47                        |
| 3                | 3  | 2.97             | 1.66             | 56.08           | 0.84             | 28.38            | 0.01             | 0.26            | 0.28                | 9.59                | 0.01                        | 0.44                        | 0.03             | 0.97            | 0.00                        | 0.08                        | 0.03                        | 0.89                        |
| 4                | 4  | 4.85             | 3.15             | 64.90           | 0.65             | 13.39            | 0.52             | 10.65           | 0.18                | 3.74                | 0.03                        | 0.55                        | 0.19             | 3.94            | 0.09                        | 1.77                        | 0.11                        | 2.17                        |
| 5                | 8  | 0.56             | 0.34             | 60.56           | 0.10             | 18.33            | 0.07             | 12.79           | 0.01                | 2.20                | 0.00                        | 0.27                        | 0.01             | 1.81            | 0.01                        | 1.27                        | 0.00                        | 0.55                        |
| 6                | 9  | 5.78             | 4.78             | 82.76           | 0.43             | 7.36             | 0.01             | 0.21            | 0.39                | 6.83                | 0.01                        | 0.19                        | 0.08             | 1.33            | 0.02                        | 0.43                        | 0.05                        | 0.90                        |
| 7                | 13 | 4.06             | 3.05             | 75.06           | 0.76             | 18.81            | 0.00             | 0.06            | 0.05                | 1.12                | 0.13                        | 3.25                        | 0.02             | 0.61            | 0.00                        | 0.02                        | 0.02                        | 0.59                        |
| 8                | 16 | 11.25            | 9.07             | 80.64           | 1.23             | 10.89            | 0.01             | 0.05            | 0.54                | 4.84                | 0.01                        | 0.08                        | 0.19             | 1.69            | 0.17                        | 1.54                        | 0.02                        | 0.15                        |
| 9                | 18 | 5.84             | 4.57             | 78.16           | 0.61             | 10.46            | 0.02             | 0.27            | 0.43                | 7.30                | 0.06                        | 1.00                        | 0.01             | 0.23            | 0.00                        | 0.00                        | 0.01                        | 0.23                        |
| 10               | 19 | 4.19             | 2.37             | 56.39           | 1.39             | 33.07            | 0.02             | 0.39            | 0.35                | 8.36                | 0.03                        | 0.82                        | 0.02             | 0.55            | 0.01                        | 0.21                        | 0.01                        | 0.34                        |
| 11               | 25 | 4.65             | 3.41             | 73.32           | 0.51             | 11.03            | 0.13             | 2.86            | 0.25                | 5.29                | 0.06                        | 1.28                        | 0.13             | 2.80            | 0.02                        | 0.40                        | 0.11                        | 2.41                        |
| 12               | 26 | 10.37            | 7.77             | 74.90           | 0.56             | 5.40             | 0.13             | 1.22            | 1.20                | 11.54               | 0.02                        | 0.20                        | 0.62             | 5.95            | 0.32                        | 3.04                        | 0.30                        | 2.91                        |
| 13               | 28 | 8.30             | 1.48             | 17.79           | 1.36             | 16.44            | 4.47             | 53.83           | 0.48                | 5.74                | 0.03                        | 0.39                        | 0.11             | 1.37            | 0.04                        | 0.52                        | 0.07                        | 0.84                        |
| 14               | 37 | 7.43             | 5.69             | 76.58           | 1.09             | 14.70            | 0.14             | 1.93            | 0.26                | 3.50                | 0.02                        | 0.25                        | 0.02             | 0.21            | 0.00                        | 0.01                        | 0.01                        | 0.20                        |
| 15               | 39 | 4.05             | 1.35             | 33.39           | 1.26             | 31.02            | 1.03             | 25.34           | 0.18                | 4.51                | 0.09                        | 2.12                        | 0.01             | 0.35            | 0.00                        | 0.03                        | 0.01                        | 0.32                        |
| 16               | 42 | 12.30            | 10.53            | 85.60           | 0.67             | 5.41             | 0.01             | 0.10            | 0.75                | 6.10                | 0.11                        | 0.90                        | 0.04             | 0.31            | 0.02                        | 0.13                        | 0.02                        | 0.18                        |
| 17               | 44 | 11.41            | 10.60            | 92.86           | 0.07             | 0.65             | 0.05             | 0.45            | 0.53                | 4.63                | 0.01                        | 0.08                        | 0.07             | 0.60            | 0.02                        | 0.16                        | 0.05                        | 0.45                        |
| Median           |    | 4.85             | 3.15             | 74.23           | 0.65             | 13.39            | 0.05             | 0.45            | 0.35                | 5.74                | 0.03                        | 0.55                        | 0.04             | 1.30            | 0.02                        | 0.40                        | 0.02                        | 0.55                        |
| Mean             |    | 6.22             | 4.40             | 67.01           | 0.74             | 14.79            | 0.40             | 6.66            | 0.38                | 6.01                | 0.04                        | 0.82                        | 0.10             | 1.53            | 0.04                        | 0.64                        | 0.05                        | 0.89                        |
| SD               |    | 3.39             | 3.25             | 19.10           | 0.41             | 9.03             | 1.08             | 13.88           | 0.28                | 2.74                | 0.04                        | 0.83                        | 0.15             | 1.51            | 0.08                        | 0.83                        | 0.07                        | 0.85                        |
| Q1 IQR           |    | 4.06             | 2.37             | 56.39           | 0.51             | 10.46            | 0.01             | 0.21            | 0.25                | 4.51                | 0.01                        | 0.25                        | 0.02             | 0.55            | 0.00                        | 0.08                        | 0.01                        | 0.32                        |
| Q3 IQR           |    | 8.30             | 5.69             | 78.16           | 1.09             | 18.33            | 0.13             | 2.86            | 0.48                | 7.66                | 0.06                        | 1.00                        | 0.11             | 1.81            | 0.03                        | 0.79                        | 0.06                        | 0.90                        |

NA or x: not available

NC: non classical

Uninfected mechanically ventilated ICU patients  
Cytokines in blood

|                  | 1     | 2        | 3      | 4     | 5      | 6     | 7      | 8     | 9     | 10    | 11       | 12     | 13     | 14     | 15     | 16     | 17      | 18     | 19     | 20     | 21     | 22     |
|------------------|-------|----------|--------|-------|--------|-------|--------|-------|-------|-------|----------|--------|--------|--------|--------|--------|---------|--------|--------|--------|--------|--------|
| At ICU admission | IL-1α | IL-1RA   | IL-1β  | IL-2  | IL-4   | IL-5  | IL-6   | IL-7  | IL-9  | IL-10 | IL-12p70 | IL-13  | IL-15  | IL-17A | IL-18  | IL-21  | IL-22   | IL-23  | IL-27  | IL-31  | IFN-α2 | IFN-γ  |
| Patient code     | pg/mL | pg/mL    | pg/mL  | pg/mL | pg/mL  | pg/mL | pg/mL  | pg/mL | pg/mL | pg/mL | pg/mL    | pg/mL  | pg/mL  | pg/mL  | pg/mL  | pg/mL  | pg/mL   | pg/mL  | pg/mL  | pg/mL  | pg/mL  | pg/mL  |
| 1                | x     | x        | x      | x     | x      | x     | x      | x     | x     | x     | x        | x      | x      | x      | x      | x      | x       | x      | x      | x      | x      | x      |
| 2                | 0.0   | 73301.5  | 0.0    | 0.0   | 0.0    | 0.0   | 2920.0 | 0.0   | 0.0   | 20.9  | 0.0      | 0.0    | 0.0    | 0.0    | 195.1  | 0.0    | 0.0     | 0.0    | 0.0    | 0.0    | 0.0    | 0.0    |
| 3                | 4.6   | 7565.1   | 41.0   | 32.6  | 23.4   | 17.8  | 648.6  | 5.8   | 0.0   | 9.4   | 5.1      | 15.9   | 107.5  | 18.0   | 115.7  | 64.6   | 154.3   | 0.0    | 213.9  | 0.0    | 0.3    | 21.5   |
| 4                | 0.4   | 825.4    | 20.9   | 26.9  | 0.0    | 3.1   | 0.0    | 1.2   | 0.0   | 4.0   | 0.0      | 10.0   | 16.1   | 11.4   | 72.2   | 0.0    | 0.0     | 0.0    | 86.7   | 0.0    | 0.0    | 5.0    |
| 6                | 3.7   | 67011.7  | 65.5   | 28.2  | 67.1   | 0.0   | 72.8   | 0.0   | 0.0   | 160.1 | 11.1     | 50.2   | 35.2   | 0.1    | 1130.6 | 72.2   | 120.2   | 86.3   | 307.2  | 126.7  | 0.0    | 97.5   |
| 7                | 1.7   | 1950.9   | 0.0    | 0.0   | 0.0    | 0.0   | 69.7   | 0.0   | 0.0   | 1.9   | 0.0      | 0.0    | 0.0    | 0.0    | 65.1   | 2.3    | 0.0     | 0.0    | 0.0    | 0.0    | 0.0    | 0.0    |
| 8                | 0.0   | 5263.5   | 22.9   | 27.4  | 3.1    | 9.1   | 222.2  | 2.2   | 0.0   | 13.9  | 4.3      | 11.2   | 33.9   | 8.6    | 73.1   | 0.0    | 0.0     | 0.0    | 156.8  | 0.0    | 0.0    | 1.3    |
| 9                | 0.0   | 367.5    | 0.0    | 0.0   | 0.0    | 0.0   | 0.0    | 0.0   | 0.0   | 0.0   | 0.0      | 0.0    | 0.0    | 0.0    | 67.8   | 0.0    | 0.0     | 0.0    | 0.0    | 0.0    | 0.0    | 0.0    |
| 10               | 3.3   | 279.1    | 0.0    | 9.7   | 0.0    | 0.0   | 0.0    | 0.8   | 0.0   | 1.2   | 0.0      | 4.9    | 0.0    | 0.0    | 23.4   | 0.0    | 90.0    | 0.0    | 0.0    | 0.0    | 0.0    | 0.0    |
| 11               | 0.5   | 1326.2   | 49.8   | 50.3  | 27.1   | 14.2  | 0.0    | 2.8   | 0.0   | 6.1   | 5.7      | 21.1   | 48.4   | 14.7   | 79.4   | 0.0    | 0.0     | 0.0    | 234.5  | 0.0    | 0.3    | 17.4   |
| 13               | 5.4   | 13401.9  | 1433.1 | 150.3 | 1033.7 | 3.6   | 533.2  | 7.5   | 0.0   | 24.7  | 235.6    | 495.4  | 365.6  | 93.3   | 87.0   | 40.7   | 301.3   | 602.2  | 3033.7 | 7.5    | 19.4   | 744.0  |
| 15               | 0.5   | 1677.5   | 93.3   | 51.3  | 44.0   | 68.1  | 18.8   | 3.9   | 0.0   | 11.0  | 6.5      | 20.4   | 51.1   | 23.4   | 160.4  | 7.5    | 0.0     | 0.0    | 361.0  | 0.0    | 0.0    | 33.1   |
| 16               | 1.0   | 530.5    | 18.2   | 25.5  | 3.8    | 4.3   | 0.0    | 2.2   | 0.0   | 2.6   | 4.6      | 10.8   | 16.7   | 7.0    | 65.1   | 0.0    | 74.8    | 0.0    | 111.1  | 0.0    | 0.0    | 0.0    |
| 18               | 0.0   | 3647.0   | 16.9   | 27.3  | 6.6    | 0.0   | 0.0    | 1.9   | 0.0   | 5.0   | 4.7      | 17.1   | 45.0   | 7.4    | 47.8   | 0.0    | 0.0     | 0.0    | 141.9  | 0.0    | 0.0    | 0.0    |
| 19               | 3.4   | 1172.3   | 42.8   | 51.5  | 29.4   | 15.2  | 0.0    | 2.6   | 0.0   | 6.3   | 4.6      | 25.1   | 58.8   | 13.2   | 83.8   | 153.0  | 96.5    | 66.5   | 250.3  | 52.6   | 0.0    | 14.1   |
| 20               | 17.6  | 5699.2   | 53.1   | 33.6  | 1059.5 | 28.8  | 533.2  | 1.6   | 0.0   | 9.4   | 780.6    | 1997.4 | 180.7  | 196.8  | 155.9  | 458.2  | 2651.7  | 0.0    | 977.1  | 0.0    | 9.5    | 772.2  |
| 21               | 0.9   | 1074.4   | 52.0   | 33.6  | 18.3   | 39.9  | 172.2  | 1.8   | 0.0   | 5.5   | 4.7      | 21.7   | 55.1   | 15.3   | 112.5  | 0.0    | 14.2    | 24.0   | 239.0  | 65.7   | 0.0    | 14.5   |
| 25               | 0.0   | 2291.1   | 16.3   | 27.3  | 6.3    | 5.6   | 159.4  | 1.5   | 0.0   | 4.3   | 4.3      | 13.4   | 24.7   | 7.2    | 74.0   | 0.0    | 0.0     | 0.0    | 100.4  | 0.0    | 0.0    | 4.4    |
| 26               | 3.0   | 2169.5   | 2.5    | 8.0   | 0.0    | 0.0   | 76.7   | 0.7   | 0.0   | 2.4   | 4.7      | 5.2    | 0.0    | 0.9    | 34.9   | 0.0    | 0.0     | 0.0    | 0.0    | 0.0    | 0.0    | 0.0    |
| 27               | 0.4   | 8123.4   | 12.1   | 15.7  | 0.0    | 0.0   | 912.8  | 1.6   | 0.0   | 15.0  | 4.1      | 8.0    | 15.5   | 4.3    | 44.7   | 0.0    | 0.0     | 0.0    | 63.9   | 0.0    | 0.0    | 0.0    |
| 28               | 5.1   | 594.7    | 11.2   | 23.6  | 0.0    | 0.0   | 0.0    | 1.7   | 0.0   | 3.8   | 6.2      | 55.7   | 35.0   | 8.6    | 50.9   | 24.5   | 104.3   | 0.0    | 334.9  | 0.0    | 0.0    | 0.0    |
| 29               | 0.6   | 1902.7   | 49.8   | 47.5  | 31.9   | 21.7  | 56.2   | 2.2   | 0.0   | 6.8   | 5.1      | 21.7   | 61.5   | 16.6   | 79.4   | 3.4    | 0.0     | 14.3   | 243.5  | 13.5   | 0.4    | 18.4   |
| 30               | 0.8   | 4386.8   | 0.0    | 14.5  | 0.0    | 0.0   | 59.4   | 1.1   | 0.0   | 7.7   | 4.2      | 6.7    | 11.6   | 3.9    | 33.1   | 0.0    | 0.0     | 0.0    | 44.0   | 0.0    | 0.0    | 0.0    |
| 32               | 0.7   | 1052.4   | 3.6    | 21.2  | 0.0    | 0.0   | 0.0    | 0.9   | 0.0   | 1.3   | 4.4      | 9.7    | 35.2   | 13.1   | 31.4   | 0.0    | 0.0     | 0.0    | 257.0  | 0.0    | 0.3    | 0.0    |
| 33               | 0.3   | 294.2    | 3.1    | 15.1  | 0.0    | 0.0   | 0.0    | 0.9   | 0.0   | 1.0   | 4.2      | 8.7    | 20.1   | 0.1    | 22.5   | 0.0    | 0.0     | 3.6    | 42.4   | 0.0    | 0.0    | 0.0    |
| 34               | 125.8 | 4453.1   | 915.6  | 77.5  | 567.0  | 0.0   | 242.9  | 19.3  | 0.0   | 27.1  | 192.3    | 416.3  | 308.3  | 44.0   | 54.4   | 1358.6 | 5819.6  | 46.0   | 1824.9 | 17.8   | 13.3   | 363.6  |
| 36               | 115.0 | 37812.7  | 957.5  | 239.2 | 942.2  | 7.6   | 1262.7 | 40.1  | 96.3  | 98.2  | 289.5    | 355.9  | 397.7  | 185.2  | 94.6   | 1395.9 | 5480.7  | 0.0    | 2351.8 | 890.5  | 16.5   | 575.1  |
| 37               | 0.0   | 309.2    | 0.0    | 0.0   | 0.0    | 0.0   | 0.0    | 0.6   | 0.0   | 0.4   | 0.0      | 0.0    | 0.0    | 0.0    | 14.5   | 0.0    | 0.0     | 0.0    | 0.0    | 0.0    | 0.0    | 0.0    |
| 38               | 0.0   | 129.7    | 0.0    | 12.9  | 0.0    | 0.0   | 0.0    | 1.8   | 0.0   | 0.6   | 0.0      | 9.2    | 11.9   | 0.0    | 25.2   | 0.0    | 0.0     | 0.0    | 10.1   | 0.0    | 0.0    | 0.0    |
| 39               | 0.0   | 402.7    | 5.8    | 12.1  | 5.0    | 0.0   | 0.0    | 1.8   | 0.0   | 1.0   | 4.0      | 11.0   | 21.7   | 0.7    | 27.8   | 0.0    | 0.0     | 0.0    | 79.8   | 0.0    | 0.0    | 0.0    |
| 42               | 0.0   | 766.4    | 0.0    | 0.0   | 0.0    | 0.0   | 75.5   | 0.5   | 0.0   | 3.0   | 0.0      | 0.0    | 0.0    | 0.0    | 61.1   | 0.0    | 0.0     | 0.0    | 25.5   | 0.0    | 0.0    | 0.0    |
| 43               | 0.6   | 2406.7   | 43.9   | 31.5  | 6.9    | 48.9  | 20.1   | 3.0   | 0.0   | 9.2   | 4.9      | 12.9   | 27.6   | 17.6   | 127.4  | 8.5    | 0.0     | 0.0    | 190.6  | 0.0    | 0.0    | 11.1   |
| 44               | 0.0   | 4249.6   | 0.0    | 0.0   | 0.0    | 0.0   | 0.0    | 1.9   | 0.0   | 0.0   | 0.0      | 0.0    | 0.0    | 0.0    | 32.2   | 0.0    | 0.0     | 0.0    | 0.0    | 0.0    | 0.0    | 0.0    |
| Median           | 0.58  | 1926.83  | 16.60  | 26.17 | 3.43   | 0.00  | 38.14  | 1.71  | 0.00  | 5.24  | 4.48     | 11.09  | 26.15  | 7.30   | 66.43  | 0.00   | 0.00    | 0.00   | 126.49 | 0.00   | 0.00   | 0.00   |
| Mean             | 8.96  | 7829.26  | 119.62 | 33.95 | 117.53 | 8.71  | 245.29 | 3.49  | 2.92  | 14.21 | 48.47    | 110.51 | 60.94  | 21.78  | 103.30 | 108.76 | 451.74  | 25.55  | 357.83 | 35.58  | 1.81   | 81.61  |
| SD               | 28.97 | 17471.45 | 324.60 | 46.94 | 303.89 | 16.17 | 563.73 | 7.42  | 16.76 | 31.46 | 148.86   | 359.87 | 102.64 | 47.12  | 190.05 | 337.68 | 1418.25 | 105.46 | 700.27 | 155.61 | 5.02   | 209.55 |
| Q1 IQR           | 0.00  | 723.47   | 0.00   | 11.51 | 0.00   | 0.00  | 0.00   | 0.89  | 0.00  | 1.77  | 0.00     | 6.31   | 8.69   | 0.11   | 34.46  | 0.00   | 0.00    | 0.00   | 21.68  | 0.00   | 0.00   | 0.00   |
| Q3 IQR           | 3.34  | 4655.68  | 49.76  | 33.61 | 27.68  | 10.35 | 184.71 | 2.29  | 0.00  | 9.82  | 5.22     | 21.72  | 52.12  | 15.65  | 88.85  | 12.51  | 91.61   | 0.00   | 251.94 | 0.00   | 0.06   | 17.66  |

| At ICU discharge | IL-1α | IL-1RA  | IL-1β | IL-2  | IL-4   | IL-5  | IL-6  | IL-7  | IL-9  | IL-10 | IL-12p70 | IL-13 | IL-15 | IL-17A | IL-18 | IL-21 | IL-22 | IL-23 | IL-27  | IL-31 | IFN-α2 | IFN-γ |
|------------------|-------|---------|-------|-------|--------|-------|-------|-------|-------|-------|----------|-------|-------|--------|-------|-------|-------|-------|--------|-------|--------|-------|
| Patient code     | pg/mL | pg/mL   | pg/mL | pg/mL | pg/mL  | pg/mL | pg/mL | pg/mL | pg/mL | pg/mL | pg/mL    | pg/mL | pg/mL | pg/mL  | pg/mL | pg/mL | pg/mL | pg/mL | pg/mL  | pg/mL | pg/mL  | pg/mL |
| 1                | 0.0   | 395.7   | 7.3   | 11.3  | 0.0    | 0.0   | 0.0   | 1.7   | 0.0   | 4.4   | 4.3      | 0.0   | 13.9  | 2.3    | 39.3  | 0.0   | 0.0   | 0.0   | 0.0    | 0.0   | 0.0    | 0.0   |
| 2                | 0.3   | 147.9   | 0.0   | 0.0   | 0.0    | 0.0   | 0.0   | 0.0   | 0.0   | 3.8   | 0.0      | 0.0   | 0.0   | 0.0    | 38.0  | 0.0   | 0.0   | 0.0   | 0.0    | 0.0   | 0.0    | 0.0   |
| 3                | 10.1  | 866.1   | 13.7  | 21.4  | 3.4    | 0.0   | 0.0   | 1.0   | 0.0   | 2.0   | 4.7      | 15.9  | 100.0 | 4.3    | 38.0  | 43.5  | 280.7 | 0.0   | 100.4  | 0.0   | 0.0    | 1.7   |
| 4                | 0.0   | 471.1   | 0.0   | 6.2   | 0.0    | 9.3   | 36.8  | 0.0   | 0.0   | 2.6   | 0.0      | 0.0   | 0.0   | 0.0    | 67.3  | 0.0   | 0.0   | 0.0   | 0.0    | 0.0   | 0.0    | 0.0   |
| 8                | 0.0   | 3723.6  | 0.0   | 0.0   | 0.0    | 0.0   | 0.0   | 0.0   | 0.0   | 0.5   | 0.0      | 0.0   | 0.0   | 0.0    | 49.1  | 0.0   | 0.0   | 0.0   | 0.0    | 0.0   | 0.0    | 0.0   |
| 9                | 0.6   | 1702.3  | 138.9 | 61.1  | 47.3   | 117.3 | 31.0  | 5.0   | 0.0   | 17.0  | 5.8      | 22.3  | 48.2  | 39.4   | 254.1 | 19.6  | 0.0   | 0.0   | 357.9  | 0.0   | 0.3    | 51.0  |
| 13               | 0.4   | 2894.7  | 304.7 | 45.2  | 503.9  | 0.0   | 0.0   | 3.9   | 0.0   | 5.0   | 136.1    | 253.2 | 227.2 | 12.8   | 55.3  | 0.0   | 0.0   | 0.0   | 1758.8 | 0.0   | 9.2    | 275.5 |
| 16               | 0.9   | 813.7   | 16.9  | 36.9  | 4.1    | 0.0   | 0.0   | 2.4   | 0.0   | 3.2   | 4.5      | 14.4  | 38.9  | 6.0    | 50.9  | 2.1   | 52.1  | 0.0   | 139.4  | 0.0   | 0.0    | 0.9   |
| 18               | 0.9   | 3128.5  | 47.6  | 44.2  | 27.4   | 18.3  | 0.0   | 4.2   | 0.0   | 9.0   | 5.6      | 20.9  | 94.9  | 17.8   | 96.4  | 11.8  | 0.0   | 41.0  | 269.1  | 16.1  | 0.8    | 13.8  |
| 19               | 1.1   | 1019.1  | 33.5  | 45.5  | 25.1   | 0.0   | 0.0   | 2.2   | 0.0   | 5.9   | 4.5      | 17.8  | 50.4  | 11.3   | 66.0  | 29.7  | 0.0   | 76.9  | 218.5  | 29.9  | 0.0    | 8.6   |
| 25               | 0.4   | 1139.9  | 46.1  | 42.2  | 21.2   | 20.9  | 0.0   | 3.3   | 0.0   | 7.3   | 5.2      | 18.9  | 43.7  | 15.7   | 101.3 | 0.0   | 0.0   | 0.0   | 227.7  | 0.0   | 0.0    | 14.9  |
| 26               | 0.4   | 8955.5  | 0.0   | 6.6   | 0.0    | 0.0   | 93.9  | 2.3   | 0.0   | 1.3   | 0.0      | 4.3   | 8.7   | 0.0    | 39.3  | 76.0  | 0.0   | 0.0   | 0.0    | 0.0   | 0.0    | 0.0   |
| 28               | 5.1   | 594.7   | 11.2  | 23.6  | 0.0    | 0.0   | 0.0   | 1.7   | 0.0   | 3.8   | 6.2      | 55.7  | 35.0  | 8.6    | 50.9  | 24.5  | 104.3 | 0.0   | 334.9  | 0.0   | 0.0    | 0.0   |
| 37               | 0.4   | 1273.6  | 44.3  | 44.7  | 19.4   | 0.0   | 0.0   | 4.0   | 0.0   | 5.2   | 5.2      | 19.1  | 60.2  | 10.8   | 74.9  | 0.0   | 0.0   | 0.0   | 227.7  | 0.0   | 0.3    | 7.3   |
| 39               | 0.0   | 402.7   | 5.8   | 12.1  | 5.0    | 0.0   | 0.0   | 1.8   | 0.0   | 1.0   | 4.0      | 11.0  | 21.7  | 0.7    | 27.8  | 0.0   | 0.0   | 0.0   | 79.8   | 0.0   | 0.0    | 0.0   |
| 42               | 1.3   | 1941.3  | 22.2  | 19.9  | 0.0    | 0.0   | 0.0   | 4.3   | 0.0   | 5.3   | 0.0      | 14.2  | 24.7  | 9.1    | 102.2 | 0.0   | 0.0   | 0.0   | 141.9  | 0.0   | 0.0    | 4.3   |
| 44               | 1.2   | 1030.2  | 33.2  | 39.0  | 10.0   | 12.1  | 0.0   | 3.5   | 0.0   | 5.3   | 4.9      | 16.8  | 43.3  | 11.1   | 78.5  | 0.0   | 0.0   | 0.0   | 159.3  | 0.0   | 0.0    | 7.4   |
| Median           | 0.44  | 1030.24 | 16.92 | 23.63 | 4.08   | 0.00  | 0.00  | 2.32  | 0.00  | 4.38  | 4.48     | 15.86 | 38.93 | 8.55   | 55.31 | 0.00  | 0.00  | 0.00  | 141.91 | 0.00  | 0.00   | 1.66  |
| Mean             | 1.36  | 1794.16 | 42.67 | 27.05 | 39.22  | 10.47 | 9.51  | 2.42  | 0.00  | 4.85  | 11.22    | 28.49 | 47.69 | 8.82   | 72.30 | 12.18 | 25.71 | 6.94  | 236.20 | 2.71  | 0.62   | 22.66 |
| SD               | 2.55  | 2114.34 | 75.40 | 19.01 | 120.50 | 28.39 | 24.48 | 1.60  | 0.00  | 3.84  | 32.25    | 59.40 | 54.96 | 9.82   | 52.27 | 21.13 | 71.20 | 20.58 | 410.06 | 8.03  | 2.21   | 66.32 |
| Q1 IQR           | 0.30  | 594.72  | 5.82  | 11.32 | 0.00   | 0.00  | 0.00  | 1.66  | 0.00  | 2.56  | 0.00     | 4.32  | 13.91 | 0.74   | 39.33 | 0.00  | 0.00  | 0.00  | 0.00   | 0.00  | 0.00   | 0.00  |
| Q3 IQR           | 1.08  | 1941.31 | 44.26 | 44.19 | 21.15  | 9.32  | 0.00  | 3.91  | 0.00  | 5.32  | 5.22     | 19.11 | 50.42 | 11.30  | 78.46 | 19.56 | 0.00  | 0.00  | 227.68 | 0.00  | 0.00   | 8.58  |

| 23     | 24              | 25               | 26               | 27               | 28                 | 29                 | 30              | 31                | 32                 | 33    | 34    | 35     | 36    | 37    | 38      | 39    | 40      | 41     | 42    | 43     | 44     | 45     |
|--------|-----------------|------------------|------------------|------------------|--------------------|--------------------|-----------------|-------------------|--------------------|-------|-------|--------|-------|-------|---------|-------|---------|--------|-------|--------|--------|--------|
| TNF-α  | CCL2<br>(MCP-1) | CCL3<br>(MIP-1α) | CCL4<br>(MIP-1β) | CCL5<br>(Rantes) | CCL11<br>(Eotaxin) | CXCL1<br>(Groα/KC) | CXCL8 (IL<br>8) | CXCL10<br>(IP-10) | CXCL12<br>(SDF-1α) | TNF-β | NGF-β | BDNF   | EGF   | FGF-2 | HGF     | LIF   | PDGF-BB | PIGF-1 | SCF   | VEGF-A | VEGF-D | GM-CSF |
| pg/mL  | pg/mL           | pg/mL            | pg/mL            | pg/mL            | pg/mL              | pg/mL              | pg/mL           | pg/mL             | pg/mL              | pg/mL | pg/mL | pg/mL  | pg/mL | pg/mL | pg/mL   | pg/mL | pg/mL   | pg/mL  | pg/mL | pg/mL  | pg/mL  | pg/mL  |
| x      | x               | x                | x                | x                | x                  | x                  | x               | x                 | x                  | x     | x     | x      | x     | x     | x       | x     | x       | x      | x     | x      | x      | x      |
| 27.4   | 419.6           | 12.4             | 153.0            | 141.6            | 9.4                | 0.0                | 230.9           | 14.3              | 2148.0             | 0.0   | 0.0   | 53.9   | 0.0   | 0.0   | 15114.5 | 19.8  | 20.2    | 7.7    | 98.5  | 3760.4 | 13.3   | 0.0    |
| 31.2   | 107.5           | 184.1            | 51.9             | 114.6            | 24.3               | 5.0                | 10.4            | 41.8              | 691.7              | 0.0   | 5.5   | 765.4  | 39.8  | 16.0  | 589.0   | 15.6  | 1126.0  | 232.8  | 11.5  | 458.3  | 0.0    | 206.9  |
| 10.3   | 84.4            | 0.0              | 44.1             | 138.9            | 14.7               | 0.0                | 0.0             | 13.3              | 927.4              | 0.0   | 0.0   | 206.6  | 6.5   | 2.6   | 592.2   | 9.4   | 100.0   | 48.9   | 5.9   | 123.4  | 0.0    | 101.1  |
| 32.6   | 561.0           | 35.9             | 241.9            | 50.0             | 11.2               | 8.2                | 26.5            | 79.0              | 2443.8             | 0.0   | 16.0  | 87.8   | 25.4  | 23.2  | 1641.8  | 4.2   | 169.3   | 34.2   | 6.7   | 741.3  | 0.0    | 209.3  |
| 0.0    | 223.5           | 6.0              | 95.2             | 99.2             | 38.8               | 0.0                | 0.0             | 17.8              | 2107.6             | 0.0   | 0.0   | 75.0   | 0.0   | 0.0   | 687.3   | 5.4   | 0.0     | 29.6   | 14.7  | 434.8  | 0.0    | 0.0    |
| 30.0   | 201.4           | 0.0              | 32.9             | 141.1            | 15.7               | 4.7                | 16.3            | 13.7              | 176.6              | 0.0   | 3.6   | 612.8  | 3.3   | 7.7   | 242.6   | 9.6   | 553.3   | 165.4  | 5.9   | 137.9  | 0.0    | 84.8   |
| 0.0    | 261.8           | 2.3              | 109.8            | 117.9            | 70.4               | 0.0                | 0.0             | 20.2              | 2027.4             | 0.0   | 0.0   | 199.9  | 5.3   | 0.0   | 539.5   | 3.2   | 15.8    | 28.7   | 5.2   | 128.5  | 0.0    | 0.0    |
| 7.1    | 116.3           | 0.0              | 28.8             | 138.2            | 11.4               | 0.0                | 0.0             | 19.5              | 396.3              | 0.0   | 0.0   | 45.6   | 0.0   | 0.0   | 157.6   | 3.8   | 459.2   | 80.8   | 1.7   | 147.9  | 0.0    | 0.0    |
| 27.9   | 29.6            | 0.0              | 31.2             | 123.2            | 11.1               | 0.0                | 0.0             | 18.0              | 244.4              | 0.0   | 3.4   | 234.6  | 18.0  | 17.7  | 336.6   | 12.2  | 912.2   | 93.2   | 8.7   | 76.9   | 0.0    | 265.6  |
| 397.3  | 153.1           | 15.4             | 119.2            | 152.3            | 44.0               | 8.7                | 6.4             | 70.6              | 1417.6             | 0.0   | 129.1 | 195.8  | 142.4 | 0.0   | 1973.4  | 42.1  | 878.4   | 150.7  | 87.6  | 125.8  | 79.6   | 775.7  |
| 18.2   | 43.5            | 4.2              | 34.1             | 103.9            | 8.9                | 5.8                | 0.0             | 8.7               | 261.5              | 0.0   | 3.7   | 151.3  | 12.8  | 13.1  | 330.6   | 24.5  | 326.6   | 89.4   | 10.3  | 72.9   | 0.0    | 303.2  |
| 13.5   | 36.2            | 0.0              | 31.2             | 141.4            | 10.9               | 0.0                | 0.0             | 20.1              | 445.4              | 0.0   | 3.3   | 209.4  | 7.2   | 0.0   | 180.0   | 8.8   | 577.6   | 130.5  | 5.3   | 201.6  | 0.0    | 121.0  |
| 23.2   | 45.8            | 0.0              | 19.2             | 79.9             | 10.1               | 0.0                | 0.0             | 14.9              | 87.7               | 0.0   | 3.3   | 137.1  | 7.4   | 2.8   | 1330.4  | 7.1   | 1469.9  | 140.3  | 8.5   | 207.8  | 0.0    | 110.4  |
| 40.1   | 36.5            | 15.8             | 30.1             | 212.6            | 19.3               | 4.9                | 0.0             | 12.1              | 181.5              | 0.0   | 0.0   | 483.2  | 17.7  | 27.1  | 203.7   | 11.2  | 607.0   | 173.9  | 6.1   | 301.5  | 0.0    | 247.7  |
| 1608.8 | 649.5           | 12.8             | 90.0             | 175.5            | 26.1               | 10.4               | 14.7            | 46.9              | 962.7              | 0.0   | 73.7  | 46.5   | 77.2  | 7.5   | 2126.6  | 87.2  | 275.5   | 123.4  | 23.1  | 1495.8 | 195.7  | 624.7  |
| 16.7   | 27.3            | 0.7              | 29.4             | 290.4            | 9.2                | 11.6               | 10.5            | 19.1              | 240.4              | 0.0   | 9.3   | 101.6  | 8.0   | 15.5  | 304.1   | 14.3  | 886.1   | 85.0   | 11.5  | 83.9   | 0.0    | 192.2  |
| 13.8   | 109.2           | 0.0              | 42.4             | 157.8            | 26.0               | 5.0                | 19.6            | 24.1              | 618.9              | 0.0   | 3.6   | 31.2   | 0.0   | 0.9   | 682.1   | 7.2   | 62.2    | 12.2   | 5.8   | 199.9  | 0.0    | 91.4   |
| 6.2    | 158.8           | 4.8              | 60.2             | 128.5            | 20.9               | 0.0                | 7.6             | 98.0              | 1244.9             | 0.0   | 5.0   | 22.1   | 0.0   | 0.0   | 2192.2  | 5.9   | 219.5   | 29.1   | 13.3  | 320.2  | 0.0    | 0.0    |
| 22.2   | 265.2           | 0.0              | 40.9             | 134.9            | 16.5               | 0.0                | 19.2            | 26.5              | 767.5              | 0.0   | 0.0   | 68.6   | 2.1   | 0.0   | 1464.6  | 8.2   | 71.9    | 31.0   | 8.9   | 567.4  | 0.0    | 23.8   |
| 15.9   | 18.5            | 0.0              | 40.9             | 121.7            | 15.0               | 0.0                | 0.0             | 17.9              | 576.6              | 0.0   | 0.0   | 92.0   | 15.2  | 34.7  | 279.6   | 6.9   | 54.4    | 21.6   | 5.1   | 139.2  | 0.0    | 158.8  |
| 32.9   | 70.1            | 0.0              | 24.0             | 123.9            | 8.6                | 0.0                | 0.0             | 9.8               | 159.3              | 0.0   | 0.0   | 289.0  | 21.0  | 12.8  | 397.8   | 12.2  | 283.0   | 121.8  | 7.9   | 82.2   | 0.0    | 250.0  |
| 12.5   | 89.0            | 0.0              | 29.3             | 109.8            | 11.6               | 0.0                | 2.3             | 32.1              | 747.5              | 0.0   | 3.2   | 16.0   | 1.7   | 0.0   | 5085.0  | 7.5   | 192.9   | 14.8   | 6.2   | 102.4  | 0.0    | 0.0    |
| 19.2   | 70.6            | 41.4             | 27.8             | 113.5            | 11.9               | 0.0                | 0.0             | 10.0              | 423.2              | 0.0   | 5.2   | 29.4   | 8.1   | 0.0   | 348.4   | 14.9  | 121.7   | 24.7   | 2.6   | 36.7   | 0.0    | 43.1   |
| 11.6   | 13.2            | 0.0              | 26.1             | 129.5            | 7.5                | 0.0                | 0.0             | 6.7               | 310.2              | 0.0   | 0.0   | 66.3   | 0.0   | 1.6   | 146.0   | 3.7   | 437.2   | 43.1   | 2.9   | 15.4   | 0.0    | 0.0    |
| 160.4  | 141.1           | 7.8              | 214.0            | 101.3            | 70.3               | 11.0               | 0.0             | 28.2              | 1563.8             | 0.0   | 44.2  | 21.8   | 101.1 | 15.1  | 292.9   | 10.4  | 172.2   | 325.9  | 37.0  | 1572.1 | 0.0    | 123.9  |
| 541.3  | 247.1           | 22.9             | 242.3            | 125.9            | 31.9               | 8.4                | 38.0            | 29.5              | 2210.9             | 0.0   | 117.1 | 93.8   | 137.1 | 92.6  | 2185.0  | 67.5  | 65.1    | 523.6  | 109.3 | 2041.1 | 89.7   | 1240.5 |
| 0.0    | 33.7            | 0.0              | 28.2             | 92.9             | 11.0               | 0.0                | 0.0             | 9.6               | 734.2              | 0.0   | 0.0   | 19.8   | 0.0   | 0.0   | 439.5   | 2.1   | 190.4   | 8.1    | 5.1   | 34.7   | 0.0    | 0.0    |
| 0.0    | 17.2            | 0.0              | 19.7             | 137.4            | 5.1                | 0.0                | 0.0             | 10.3              | 253.1              | 0.0   | 0.0   | 69.2   | 2.4   | 0.0   | 134.4   | 3.6   | 78.8    | 20.4   | 1.4   | 39.9   | 0.0    | 29.1   |
| 0.0    | 17.7            | 0.0              | 18.7             | 156.3            | 7.2                | 0.0                | 0.0             | 17.3              | 169.7              | 0.0   | 0.0   | 127.0  | 3.6   | 0.0   | 116.4   | 4.7   | 168.5   | 55.1   | 1.6   | 25.1   | 0.0    | 81.3   |
| 0.0    | 125.4           | 0.0              | 30.2             | 109.0            | 10.3               | 0.0                | 2.0             | 37.7              | 767.5              | 0.0   | 3.3   | 5.9    | 0.0   | 0.0   | 1483.8  | 3.4   | 205.1   | 3.3    | 6.7   | 242.1  | 0.0    | 0.0    |
| 14.2   | 23.7            | 19.5             | 39.9             | 97.4             | 13.5               | 4.5                | 2.8             | 15.8              | 646.8              | 0.0   | 5.7   | 63.8   | 16.6  | 0.0   | 697.7   | 20.4  | 510.3   | 49.7   | 16.8  | 174.5  | 0.0    | 156.1  |
| 0.0    | 52.8            | 2.3              | 28.6             | 135.9            | 9.0                | 0.0                | 3.8             | 26.9              | 720.3              | 0.0   | 0.0   | 9.7    | 0.0   | 0.0   | 3223.9  | 3.6   | 19.8    | 2.3    | 5.7   | 154.5  | 0.0    | 0.0    |
| 16.29  | 86.69           | 0.34             | 33.49            | 127.18           | 11.74              | 0.00               | 0.00            | 18.57             | 669.27             | 0.00  | 3.29  | 81.40  | 6.84  | 0.47  | 489.46  | 8.49  | 198.96  | 49.33  | 6.67  | 151.18 | 0.00   | 96.26  |
| 95.48  | 137.49          | 11.78            | 63.28            | 131.01           | 18.89              | 2.66               | 12.45           | 25.72             | 828.59             | 0.00  | 13.37 | 142.83 | 20.80 | 8.82  | 1382.06 | 14.21 | 346.33  | 89.40  | 16.79 | 436.28 | 11.46  | 167.78 |
| 294.62 | 154.42          | 32.68            | 63.78            | 46.55            | 16.34              | 3.91               | 40.29           | 21.31             | 699.79             | 0.00  | 31.87 | 174.59 | 37.73 | 17.66 | 2698.85 | 18.40 | 363.48  | 108.03 | 27.34 | 764.74 | 38.93  | 260.48 |
| 6.85   | 35.60           | 0.00             | 28.76            | 109.60           | 9.92               | 0.00               | 0.00            | 13.59             | 259.39             | 0.00  | 0.00  | 42.02  | 0.00  | 0.00  | 270.32  | 4.57  | 77.04   | 23.88  | 5.26  | 83.43  | 0.00   | 0.00   |
| 30.30  | 169.45          | 12.52            | 67.62            | 141.17           | 21.76              | 4.95               | 10.44           | 28.54             | 1033.27            | 0.00  | 5.30  | 196.79 | 17.74 | 13.58 | 1523.27 | 14.41 | 521.07  | 125.20 | 11.97 | 348.84 | 0.00   | 207.50 |
|        |                 |                  |                  |                  |                    |                    |                 |                   |                    |       |       |        |       |       |         |       |         |        |       |        |        |        |

| TNF-α | CCL2<br>(MCP-1) | CCL3<br>(MIP-1α) | CCL4<br>(MIP-1β) | CCL5<br>(Rantes) | CCL11<br>(Eotaxin) | CXCL1<br>(Groα/KC) | CXCL8 (IL<br>8) | CXCL10<br>(IP-10) | CXCL12<br>(SDF-1α) | TNF-β | NGF-β | BDNF   | EGF   | FGF-2 | HGF     | LIF   | PDGF-BB | PIGF-1 | SCF   | VEGF-A | VEGF-D | GM-CSF |
|-------|-----------------|------------------|------------------|------------------|--------------------|--------------------|-----------------|-------------------|--------------------|-------|-------|--------|-------|-------|---------|-------|---------|--------|-------|--------|--------|--------|
| pg/mL | pg/mL           | pg/mL            | pg/mL            | pg/mL            | pg/mL              | pg/mL              | pg/mL           | pg/mL             | pg/mL              | pg/mL | pg/mL | pg/mL  | pg/mL | pg/mL | pg/mL   | pg/mL | pg/mL   | pg/mL  | pg/mL | pg/mL  | pg/mL  | pg/mL  |
| 0.0   | 19.9            | 31.8             | 32.8             | 171.1            | 5.9                | 0.0                | 0.0             | 21.1              | 578.8              | 0.0   | 0.0   | 101.6  | 0.0   | 0.0   | 233.5   | 10.8  | 399.5   | 42.6   | 4.0   | 144.4  | 0.0    | 0.0    |
| 0.0   | 89.3            | 57.3             | 225.5            | 146.2            | 13.1               | 0.0                | 6.6             | 78.6              | 1990.2             | 0.0   | 0.0   | 55.5   | 0.0   | 0.0   | 997.3   | 15.3  | 26.0    | 5.7    | 103.2 | 2042.1 | 11.5   | 0.0    |
| 9.9   | 33.0            | 211.3            | 46.0             | 163.7            | 13.9               | 0.0                | 0.0             | 22.2              | 335.6              | 0.0   | 0.0   | 219.1  | 13.5  | 4.6   | 217.1   | 6.1   | 789.4   | 218.7  | 6.0   | 469.9  | 0.0    | 84.8   |
| 74.3  | 685.4           | 1.5              | 97.4             | 50.3             | 50.5               | 0.0                | 0.0             | 37.9              | 4162.8             | 0.0   | 0.0   | 382.3  | 9.4   | 0.0   | 1237.5  | 8.5   | 140.8   | 29.3   | 5.1   | 233.7  | 0.0    | 0.0    |
| 0.0   | 468.9           | 6.3              | 130.5            | 248.7            | 94.8               | 0.0                | 0.0             | 52.7              | 1840.2             | 0.0   | 0.0   | 307.4  | 29.7  | 0.0   | 1495.0  | 4.0   | 48.0    | 49.5   | 26.3  | 2092.0 | 0.0    | 0.0    |
| 12.5  | 36.4            | 7.1              | 32.7             | 111.9            | 13.6               | 7.0                | 0.0             | 14.9              | 374.1              | 0.0   | 5.4   | 203.0  | 28.4  | 34.2  | 1413.7  | 36.0  | 549.7   | 137.3  | 14.4  | 97.1   | 0.0    | 375.6  |
| 138.1 | 48.8            | 0.0              | 28.9             | 89.2             | 10.0               | 0.0                | 0.0             | 18.4              | 94.7               | 0.0   | 46.6  | 198.8  | 63.6  | 0.0   | 604.6   | 8.9   | 1250.5  | 131.5  | 19.5  | 37.9   | 0.0    | 284.1  |
| 23.6  | 15.1            | 0.0              | 17.9             | 126.4            | 8.2                | 0.0                | 0.0             | 9.2               | 131.1              | 0.0   | 0.0   | 329.2  | 11.6  | 0.0   | 238.6   | 7.5   | 829.5   | 153.6  | 3.4   | 187.2  | 0.0    | 158.8  |
| 40.8  | 31.5            | 0.0              | 24.6             | 91.6             | 10.2               | 4.2                | 0.0             | 8.3               | 103.2              | 0.0   | 4.6   | 234.4  | 34.7  | 16.7  | 133.7   | 11.3  | 1347.0  | 178.9  | 7.4   | 174.8  | 0.0    | 253.4  |
| 26.4  | 29.4            | 4.3              | 22.4             | 192.9            | 17.8               | 0.0                | 0.0             | 10.0              | 71.3               | 0.0   | 0.0   | 372.7  | 11.8  | 9.5   | 92.8    | 9.8   | 563.3   | 136.1  | 4.7   | 216.9  | 0.0    | 273.3  |
| 19.4  | 53.4            | 0.0              | 35.0             | 164.6            | 20.9               | 10.2               | 2.3             | 28.3              | 335.9              | 0.0   | 3.6   | 424.3  | 18.8  | 23.2  | 292.9   | 13.7  | 235.2   | 103.9  | 9.3   | 69.6   | 0.0    | 209.3  |
| 11.3  | 9.9             | 0.0              | 45.3             | 183.7            | 11.7               | 0.0                | 2.5             | 23.1              | 809.6              | 0.0   | 3.6   | 175.6  | 12.6  | 0.3   | 4280.8  | 4.8   | 515.7   | 92.9   | 27.3  | 339.1  | 0.0    | 0.0    |
| 15.9  | 18.5            | 0.0              | 40.9             | 121.7            | 15.0               | 0.0                | 0.0             | 17.9              | 576.6              | 0.0   | 0.0   | 92.0   | 15.2  | 34.7  | 279.6   | 6.9   | 54.4    | 21.6   | 5.1   | 139.2  | 0.0    | 158.8  |
| 24.1  | 21.3            | 0.0              | 22.2             | 108.8            | 6.0                | 3.5                | 0.0             | 7.6               | 70.5               | 0.0   | 0.0   | 154.6  | 19.4  | 5.9   | 136.4   | 7.7   | 96.4    | 53.0   | 4.4   | 35.6   | 0.0    | 168.0  |
| 0.0   | 17.7            | 0.0              | 18.7             | 156.3            | 7.2                | 0.0                | 0.0             | 17.3              | 169.7              | 0.0   | 0.0   | 127.0  | 3.6   | 0.0   | 116.4   | 4.7   | 168.5   | 55.1   | 1.6   | 25.1   | 0.0    | 81.3   |
| 8.3   | 36.4            | 0.0              | 49.4             | 188.6            | 12.4               | 10.0               | 2.8             | 35.6              | 542.6              | 0.0   | 5.2   | 127.7  | 22.5  | 12.8  | 713.3   | 8.6   | 389.9   | 73.1   | 11.7  | 303.6  | 0.0    | 0.0    |
| 15.0  | 15.2            | 0.0              | 23.4             | 97.7             | 7.9                | 3.5                | 0.0             | 9.0               | 90.2               | 0.0   | 0.0   | 136.6  | 8.5   | 0.3   | 387.9   | 10.1  | 122.5   | 56.1   | 6.2   | 102.1  | 0.0    | 122.4  |
| 14.96 | 31.53           | 0.00             | 32.83            | 146.20           | 12.40              | 0.00               | 0.00            | 18.40             | 335.85             | 0.00  | 0.00  | 198.75 | 13.50 | 0.26  | 292.86  | 8.61  | 389.89  | 73.05  | 6.22  | 174.75 | 0.00   | 122.43 |
| 24.67 | 95.88           | 18.79            | 52.56            | 141.95           | 18.76              | 2.26               | 0.84            | 24.24             | 722.18             | 0.00  | 4.06  | 214.23 | 17.83 | 8.35  | 757.12  | 10.27 | 442.72  | 90.53  | 15.27 | 394.71 | 0.67   | 127.63 |
| 34.49 | 186.11          | 51.86            | 53.43            | 48.92            | 22.11              | 3.62               | 1.79            | 18.56             | 1057.03            | 0.00  | 11.18 | 111.57 | 15.37 | 12.02 | 1023.03 | 7.28  | 409.89  | 60.31  | 23.97 | 640.38 | 2.78   | 121.18 |
| 8.29  | 18.52           | 0.00             | 23.35            | 108.75           | 8.23               | 0.00               | 0.00            | 10.04             | 103.21             | 0.00  | 0.00  | 127.71 | 9.40  | 0.00  | 217.11  | 6.92  | 122.46  | 49.48  | 4.68  | 97.06  | 0.00   | 0.00   |
| 24.11 | 48.77           | 6.29             | 46.03            | 171.14           | 15.03              | 3.53               | 0.00            | 28.27             | 578.77             | 0.00  | 3.63  | 307.40 | 22.49 | 12.76 | 997.26  | 10.77 | 563.25  | 136.14 | 14.35 | 303.59 | 0.00   | 209.31 |
